# Supplementary material for: Green One-Pot Syntheses of 2-Sulfoximidoyl-3,6-dibromo Indoles Using N-Br Sulfoximines as Both Brominating and Sulfoximinating Reagents
Source: MDPI journal article supplement (doi:10.3390/molecules28083380), 2023-04-11

# **Green One-Pot Syntheses of 2-Sulfoximidoyl-3,6-Dibromo Indoles using *N*-Br Sulfoximines as Both Brominating Reagents and Sulfoximinating Reagents**

Xiao Yun Chen<sup>1</sup> \*, Yaonan Tang<sup>1</sup>, Xinran Xiang<sup>1</sup>, Yisong Tang<sup>1</sup>, Mingyang Huang<sup>1</sup>, Shaojun Zheng<sup>1</sup> \* and Cuifeng Yang<sup>2,3</sup>

<sup>1</sup> School of Environmental and Chemical Engineering, Jiangsu University of Science and Technology, Zhenjiang 212003, Jiangsu province, China;

<sup>2</sup> Modern Chemistry Research Institute of Xi'an, Xi'an 710065, China;

<sup>3</sup> State Key Laboratory of Fluorine & Nitrogen Chemicals, Xi'an 710065, China

\*E-mail: [chenxy@just.edu.cn](mailto:chenxy@just.edu.cn); [sz281cam@just.edu.cn](mailto:sz281cam@just.edu.cn)

## **Supporting Information**

### **Table of Contents**

|            |                                                                                     |            |
|------------|-------------------------------------------------------------------------------------|------------|
| <b>1.</b>  | <b>General information</b>                                                          | <b>S2</b>  |
| <b>2.1</b> | <b>General procedure (GP) for the preparation of <i>N</i>-bromosulfoximines</b>     | <b>S2</b>  |
| <b>2.2</b> | <b>General procedure (GP) for the preparation of <i>N</i>-aryl indole</b>           | <b>S2</b>  |
| <b>2.3</b> | <b>General procedure (GP) for the preparation of <i>N</i>-alkyl indole</b>          | <b>S2</b>  |
| <b>2.4</b> | <b>General procedure (GP) for the preparation of various <i>N</i>-methyl indole</b> | <b>S3</b>  |
| <b>2.6</b> | <b>The additional optimization of bromosulfoximation of <i>N</i>-Me indole</b>      |            |
| <b>3.</b>  | <b>Characterization data</b>                                                        | <b>S4</b>  |
| <b>4.</b>  | <b>X-ray crystallography</b>                                                        | <b>S13</b> |
| <b>5.</b>  | <b>Reference</b>                                                                    | <b>S13</b> |
| <b>6.</b>  | <b>NMR spectra for all compounds</b>                                                | <b>S14</b> |

## 1 General Information

All solvents were obtained from commercial sources and used without further purification unless otherwise noted. The *N*-Br sulfoximines were prepared according to literature protocols.<sup>[1]</sup> All *N*-protected indole were prepared according to literature protocols.<sup>[2]</sup> Other chemicals were obtained from Energy Chemical and Titan. <sup>1</sup>H and <sup>13</sup>C NMR spectra were recorded on a Bruker DRX-400 spectrometer using CDCl<sub>3</sub> or DMSO-*d*<sub>6</sub> as solvent and TMS as an internal standard. High-resolution mass spectra (HRMS) were obtained on an AB 5800 MALDI-TOF/TOF and recorded using electrospray ionization (ESI). The single-crystal X-ray diffraction was conducted in the X-Ray and Spectral Center at Huazhong University of Science and Technology, China.

### 2.1 General procedure (GP) for the preparation of *N*-Br sulfoximines<sup>[1]</sup>

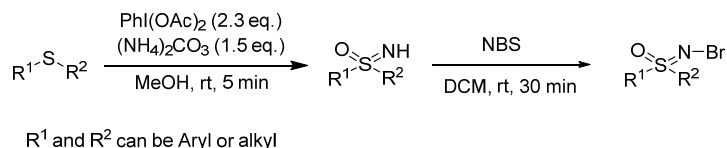

Thioether (10 mmol) was added to a stirring solution of PhI(OAc)<sub>2</sub> (23 mmol, 7.40 g) and (NH<sub>4</sub>)<sub>2</sub>CO<sub>3</sub> (15 mmol, 1.44 g) in MeOH (100 mL). Then, the reaction mixture was stirred for another 5 min at room temperature. After the consumption of the thioanisole (monitored by TLC), the reaction solvent was removed under reduced pressure. The crude product was purified by flash column chromatography on SiO<sub>2</sub> to give pure *N*-H sulfoximine as yellow oil.

Sulfoximines (9.6 mmol) were added to a solution of NBS (2.55 g, 14.3 mmol) in 100 mL DCM. The reaction mixture was stirred at room temperature for 30 min. After the consumption of the sulfoximines (monitored by TLC), the reaction solvent was removed under reduced pressure. The crude product was purified by flash column chromatography on SiO<sub>2</sub> to give *N*-Br sulfoximine as the yellow solid.

### 2.2 General procedure (GP) for the preparation of *N*-aryl indole

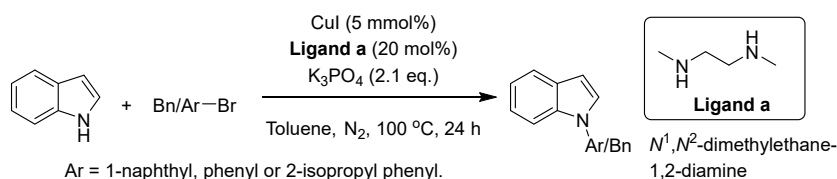

A sealed Schlenk tube with a mixture of CuI (38.1 mg, 0.2 mmol) and K<sub>3</sub>PO<sub>4</sub> (1.78 g, 8.4 mmol) inside was evacuated and then filled with N<sub>2</sub> (3 times repeated). Subsequently, indole (468.6 mg, 4 mmol), **Ligand a** (88  $\mu$ L, 0.8 mmol), Ar/Bn-Br (4.8 mmol) and 2 mL toluene were added into the Schlenk tube under a flow of N<sub>2</sub>. The final reaction mixture was vigorously stirred at 110 °C under N<sub>2</sub> atmosphere for 24 h. After the reaction was completed, the reaction mixture was cooled to room temperature. Then, the mixture was diluted with 60 mL H<sub>2</sub>O. The aqueous phase was extracted with EtOAc (3  $\times$  30 mL), and the final combined organic phase was dried over Na<sub>2</sub>SO<sub>4</sub>. The crude product was given after filtration and concentrated in vacuo, then purified by column chromatography on SiO<sub>2</sub> by using PE as eluent to give corresponding *N*-Ar/Bn indoles.

### 2.3 General procedure (GP1) for the preparation of *N*-alkyl indole

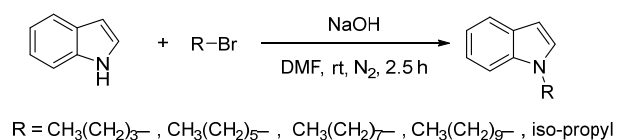

A mixture of indole (0.59 g, 5.0 mmol), alkyl bromide (5.0 mmol), NaOH (0.40 g, 10.0 mmol) in DMF (10 mL) was vigorously stirred at room temperature under nitrogen atmosphere for 2.5 h. Subsequently, the reaction mixture was diluted with 60 mL H<sub>2</sub>O. The aqueous phase was extracted with EtOAc (3  $\times$  30 mL), and the combined organic phase was dried over Na<sub>2</sub>SO<sub>4</sub>. The crude product was obtained after filtration and concentrated in vacuo and subsequently purified by column chromatography on SiO<sub>2</sub> by using V<sub>PE</sub> / V<sub>EA</sub> = 32/1 as eluent to give the desired pure products.

### 2.4 General procedure (GP2) for the preparation of various substituted *N*-methyl indoles

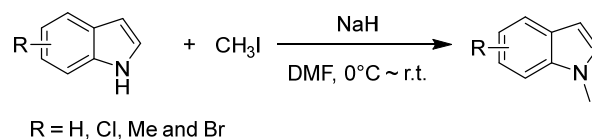

To a suspended solution of NaH (180.0 mg, 7.5 mmol) in dry DMF (2.5 mL), the solution of indole (5 mmol) in DMF (2.5 mL) was added dropwise at 0 °C. The final reaction mixture was stirred for 15 min at 0 °C, then for another 1 h at room temperature.

Following that, the mixture was treated with iodomethane (405  $\mu$ L, 6.5 mmol) at 0  $^{\circ}$ C, and the final reaction mixture was stirred at room temperature for an additional 30 min. Then, the reaction mixture was quenched with 20 mL  $\text{NH}_4\text{Cl}$  saturated solution at 0  $^{\circ}$ C. The aqueous solution was extracted with ether ( $3 \times 20$  mL). The combined organic layer was washed with brine, dried over anhydrous  $\text{Na}_2\text{SO}_4$ , and concentrated in vacuo. The resulting oil was purified by column chromatography on  $\text{SiO}_2$  ( $V_{\text{PE}}/V_{\text{EA}} = 32/1$ ) to afford the corresponding product.

## 2.5 General procedure (GP) for the preparation of product 3

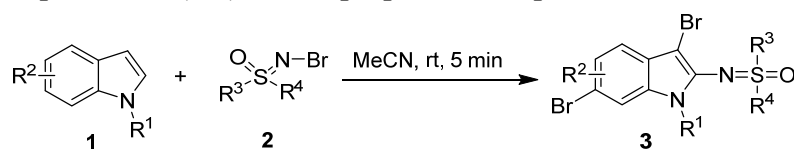

*N*-Br sulfoximine **2** (1.2 mmol, 3 equiv.) was added to the solution of *N*-substituted indole **1** (0.4 mmol) in MeCN (2 mL) at room temperature. Then, the reaction mixture was stirred at room temperature for another 5 min. Following that, the reaction solvent was concentrated in vacuo and the residue was purified by column chromatography on neutral alumina by using  $V_{\text{EA}}/V_{\text{PE}}$  as eluent to afford the desired product **3**.

## 2.6 The additional optimization of bromosulfoximation of *N*-Me indole

Firstly, the reaction was investigated under a copper-catalyzed condition. The optimization was evaluated in the presence of a combination of base and copper salt. According to the results, none of the reaction temperature, time, KOAc, or copper salt had any obvious effect on the reaction. Only the amount of *N*-Br sulfoximine has affected the product and its yield. When less than 2 equivalent of the *N*-Br sulfoximine was used in this new protocol, only 2-sulfoximidoyl-3-bromo indole was afforded in 10–65% yield. The mixture was produced when 2 to 2.5 equivalent of *N*-Br sulfoximine was used. Pure 2-sulfoximidoyl-3,6-dibromo indole could be produced in good yields when the 3 equivalent of the *N*-Br sulfoximine was included in this protocol. Compared to the protocol in the absence of base and copper salt, the addition of copper salts would decrease the yields, and the base KOAc would increase the yield slightly, but the amount of *N*-Br sulfoximine played a defining role in the reaction.

**Table S1** Additional optimization of bromosulfoximation of *N*-Me indole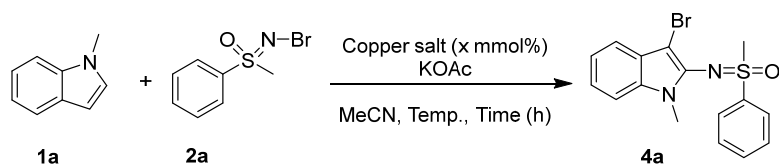

| Entry | Temp.<br>(°C) | Time   | Base | Catalyst                        | Equiv. of<br><b>2a</b> | Weight<br>(mg) | Yield % |
|-------|---------------|--------|------|---------------------------------|------------------------|----------------|---------|
| 1     | r.t.          | 1 h    | KOAc | 5 mol%<br>CuBr                  | 1                      | 42.2           | 29      |
| 2     | r.t.          | 1.5 h  | KOAc | 5 mol%<br>CuBr                  | 1                      | 40.7           | 28      |
| 3     | r.t.          | 4 h    | KOAc | 5 mol%<br>CuBr                  | 1                      | 28.5           | 20      |
| 4     | r.t.          | 4 h    | KOAc | 10 mol%<br>CuBr                 | 1                      | 32.3           | 22      |
| 5     | r.t.          | 4 h    | KOAc | 20 mol%<br>CuBr                 | 1                      | 14.4           | 10      |
| 6     | r.t.          | 30 min | KOAc | 5 mol%<br>CuBr                  | 1                      | 37.9           | 26      |
| 7     | 70            | 1 h    | KOAc | 5 mol%<br>CuBr                  | 1                      | 21.3           | 20      |
| 8     | 70            | 1 h    | KOAc | 5 mol%<br>CuBr                  | 1                      | 31.9           | 22      |
| 9     | 70            | 1 h    | KOAc | 5 mol%<br>CuBr                  | 1                      | 23.3           | 16      |
| 10    | 70            | 12 h   | None | 10 mol%<br>Cu(OAc) <sub>2</sub> | 1                      | 39.2           | 27      |
| 11    | 30            | 5 min  | KOAc | 10 mol%<br>CuBr                 | 1.5                    | 66.5           | 46      |
| 12    | 30            | 5 min  | KOAc | 10 mol%<br>CuBr                 | 2                      | 94.5           | 65      |

|    |    |       |      |                   |   |       |                 |
|----|----|-------|------|-------------------|---|-------|-----------------|
| 13 | 30 | 5 min | KOAc | 10 mol%           | 3 | 134.0 | 76 <sup>b</sup> |
|    |    |       |      | CuBr              |   |       |                 |
| 14 | 30 | 5 min | KOAc | 10 mol%           | 3 | 140.2 | 79 <sup>b</sup> |
|    |    |       |      | CuCl              |   |       |                 |
| 15 | 30 | 5 min | KOAc | 10 mol%           | 3 | 132.0 | 75 <sup>b</sup> |
|    |    |       |      | CuI               |   |       |                 |
| 16 | 30 | 5 min | KOAc | 10 mol%           | 3 | 143.6 | 81 <sup>b</sup> |
|    |    |       |      | CuCl <sub>2</sub> |   |       |                 |
| 17 | 30 | 5 min | KOAc | 10 mol%           | 3 | 141.0 | 80 <sup>b</sup> |
|    |    |       |      | CuBr <sub>2</sub> |   |       |                 |
| 18 | 30 | 5 min | KOAc | None              | 3 | 159.2 | 90 <sup>b</sup> |
| 19 | 30 | 5 min | None | None              | 3 | 156   | 88 <sup>b</sup> |

<sup>a</sup> Unless otherwise noted, the reactions were performed with indicated amounts of *N*-Br methyl phenyl sulfoximine **2a** added to the solution of 0.4 mmol *N*-Me indole in 2 mL MeCN at indicated temperatures. All yields were isolated. <sup>b</sup> The product was 2-sulfoximidoyl-3,6-dibrom indole.

### 3 Characterization Data<sup>[3]</sup>

#### 1-Butyl-1H-indole (1a)

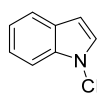

According to the general procedure (GP1) for the preparation of *N*-alkyl indole, the 1-butyl-1H-indole was prepared as yellow oil in 97% yield.

<sup>1</sup>H NMR (400 MHz, chloroform-*d*)  $\delta$  7.61 (dq,  $J$  = 7.8, 1.0 Hz, 1H), 7.29 (dq,  $J$  = 8.3, 0.9 Hz, 1H), 7.17 (ddt,  $J$  = 8.2, 7.0, 1.5 Hz, 1H), 7.07 (ddt,  $J$  = 7.9, 6.9, 1.0 Hz, 1H), 7.02 – 6.98 (m, 1H), 6.45 (dt,  $J$  = 3.1, 0.9 Hz, 1H), 4.00 (t,  $J$  = 7.1 Hz, 2H), 1.72 (tt,  $J$  = 9.1, 6.8 Hz, 2H), 1.26 (dtd,  $J$  = 16.7, 8.3, 7.9, 6.7 Hz, 2H), 0.88 (td,  $J$  = 7.3, 1.4 Hz, 3H).

#### 1-Hexyl-1H-indole (1b)

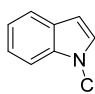

According to the general procedure (GP1) for the preparation of *N*-alkyl indole, the 1-hexyl-1H-indole was prepared as yellow oil in 95% yield.

<sup>1</sup>H NMR (400 MHz, chloroform-*d*)  $\delta$  7.63 (dt,  $J$  = 7.9, 1.0 Hz, 1H), 7.34 (dd,  $J$  = 8.3, 1.1 Hz, 1H), 7.20 (ddd,  $J$  = 8.2, 6.9, 1.2 Hz, 1H), 7.12 – 7.06 (m, 2H), 6.48

(d,  $J = 3.3$  Hz, 1H), 4.10 (t,  $J = 7.2$  Hz, 2H), 1.82 (s, 2H), 1.30 (q,  $J = 4.3, 3.3$  Hz, 6H), 0.92 – 0.82 (m, 3H).

### 1-Octyl-1H-indole (1c)

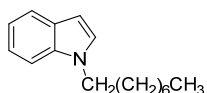

According to the general procedure (GP1) for the preparation of *N*-alkyl indole, the 1-octyl-1H-indole was prepared as yellow oil in 96% yield.

$^1\text{H}$  NMR (400 MHz, chloroform-*d*)  $\delta$  7.60 (d,  $J = 7.9$  Hz, 1H), 7.29 (d,  $J = 8.3$  Hz, 1H), 7.17 (t,  $J = 7.6$  Hz, 1H), 7.11 – 6.99 (m, 2H), 6.45 (d,  $J = 3.1$  Hz, 1H), 4.02 (t,  $J = 7.2$  Hz, 2H), 1.77 (t,  $J = 7.0$  Hz, 2H), 1.25 (dd,  $J = 12.9, 5.8$  Hz, 10H), 0.86 (t,  $J = 6.7$  Hz, 3H).

### 1-Decyl-1H-indole (1d)

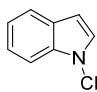

According to the general procedure (GP1) for the preparation of *N*-alkyl indole, the 1-decyl-1H-indole was prepared as yellow oil in 95% yield.

$^1\text{H}$  NMR (400 MHz, chloroform-*d*)  $\delta$  7.62 (dt,  $J = 7.9, 1.0$  Hz, 1H), 7.32 (dq,  $J = 8.2, 0.9$  Hz, 1H), 7.19 – 7.16 (m, 1H), 7.11 – 7.08 (m, 1H), 7.08 – 7.06 (m, 1H), 6.47 (dd,  $J = 3.2, 0.9$  Hz, 1H), 4.07 (t,  $J = 7.2$  Hz, 2H), 1.85 – 1.75 (m, 2H), 1.31 – 1.18 (m, 14H), 0.90 – 0.85 (m, 3H).

### 1,4-Dimethyl-1H-indole (1e)

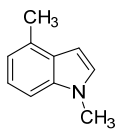

According to the general procedure (GP2) for the preparation of *N*-alkyl indole, the 1,4-dimethyl-1H-indole was prepared as yellow oil in 64% yield.  $^1\text{H}$  NMR (400 MHz, chloroform-*d*)  $\delta$  7.13 – 7.09 (m, 2H), 6.96 (d,  $J = 3.2$  Hz, 1H), 6.89 (td,  $J = 4.0, 0.9$  Hz, 1H), 6.47 (dd,  $J = 3.2, 0.6$  Hz, 1H), 3.67 (s, 3H), 2.54 (d,  $J = 1.1$  Hz, 3H).

### 1,7-Dimethyl-1H-indole (1f)

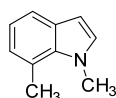

According to the general procedure (GP2) for the preparation of *N*-alkyl indole, the 1,7-dimethyl-1H-indole was prepared as white oil in 80% yield.  $^1\text{H}$  NMR (400 MHz, chloroform-*d*)  $\delta$  7.43 (ddd,  $J = 7.8, 1.3, 0.7$  Hz, 1H), 6.95 (dd,  $J = 7.8, 7.1$  Hz, 1H), 6.90 – 6.86 (m, 2H), 6.41 (d,  $J = 3.1$  Hz, 1H), 4.00 (s, 3H), 2.74 (d,  $J = 0.8$  Hz, 3H).

### 7-Chloro-1-methyl-1H-indole (1g)

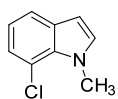

According to the general procedure (GP2) for the preparation of *N*-alkyl indole, the 1-octyl-1H-indole was prepared as white solid in 93% yield. <sup>1</sup>H NMR (400 MHz, chloroform-*d*)  $\delta$  7.47 (dd,  $J = 7.9, 1.0$  Hz, 1H), 7.12 (dd,  $J = 7.6, 1.0$  Hz, 1H), 6.98 – 6.92 (m, 2H), 6.44 (d,  $J = 3.1$  Hz, 1H), 4.10 (s, 3H).

### 7-Bromo-1-methyl-1H-indole (1h)

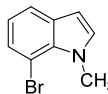

According to the general procedure (GP2) for the preparation of *N*-alkyl indole, the 1-octyl-1H-indole was prepared as yellow solid in 82% yield. <sup>1</sup>H NMR (400 MHz, chloroform-*d*)  $\delta$  7.52 (dd,  $J = 7.8, 1.0$  Hz, 1H), 7.33 (dd,  $J = 7.6, 1.0$  Hz, 1H), 6.97 (d,  $J = 3.2$  Hz, 1H), 6.90 (t,  $J = 7.7$  Hz, 1H), 6.44 (d,  $J = 3.1$  Hz, 1H), 4.14 (s, 3H).

### 1-Phenyl-1H-indole (1i)

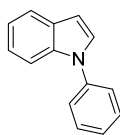

According to the general procedure (GP) for the preparation of *N*-aryl indole, the 1-phenyl-1H-indole was prepared as yellow oil in 56% yield. <sup>1</sup>H NMR (400 MHz, chloroform-*d*)  $\delta$  7.72 – 7.64 (m, 1H), 7.60 – 7.52 (m, 1H), 7.48 (d,  $J = 4.4$  Hz, 4H), 7.32 (p,  $J = 4.6$  Hz, 2H), 7.25 – 7.11 (m, 2H), 6.67 (dd,  $J = 3.3, 0.8$  Hz, 1H).

### 1-Benzyl-1H-indole (1j)

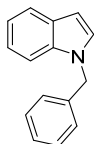

According to the general procedure (GP) for the preparation of *N*-aryl indole, the 1-benzyl-1H-indole was prepared as white solid in 83% yield. <sup>1</sup>H NMR (400 MHz, chloroform-*d*)  $\delta$  8.03 – 7.98 (m, 1H), 7.59 – 7.43 (m, 6H), 7.34 (q,  $J = 2.9$  Hz, 3H), 6.88 (dd,  $J = 3.1, 0.9$  Hz, 1H), 5.44 (s, 2H).

### 1-(2-Isopropylphenyl)-1H-indole (1k)

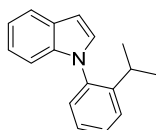

According to the general procedure (GP) for the preparation of *N*-aryl indole, the 1-(2-isopropylphenyl)-1H-indole was prepared as red oil in 50% yield. <sup>1</sup>H NMR (400 MHz, chloroform-*d*)  $\delta$  7.71 – 7.63 (m, 1H), 7.49 – 7.36 (m, 2H), 7.28 – 7.19 (m, 2H), 7.17 – 7.07 (m, 3H), 7.04 – 6.98 (m, 1H), 6.65 (dd,  $J =$



3.2, 0.9 Hz, 1H), 2.64 (hept,  $J = 6.9$  Hz, 1H), 1.08 (dd,  $J = 20.6, 6.8$  Hz, 6H).

### 1-(Naphthalen-1-yl)-1H-indole (1l)

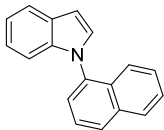

According to the general procedure (GP) for the preparation of *N*-aryl indole, the 1-(2-isopropylphenyl)-1H-indole was prepared as light blue solid in 52% yield.  $^1\text{H}$  NMR (400 MHz, chloroform-*d*)  $\delta$  7.99 – 7.90 (m, 2H), 7.74 (dt,  $J = 8.0, 1.0$  Hz, 1H), 7.60 – 7.48 (m, 3H), 7.47 – 7.31 (m, 3H), 7.24 – 7.08 (m, 3H), 7.02 (dd,  $J = 8.4, 1.2$  Hz, 1H), 6.76 (dd,  $J = 3.2, 0.9$  Hz, 1H).

### 1-Isopropyl-1H-indole (1m)

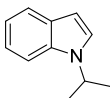

According to the general procedure (GP1) for the preparation of *N*-alkyl indole, the 1-isopropyl-1H-indole was prepared as yellow oil in 76% yield.  $^1\text{H}$  NMR (400 MHz, chloroform-*d*)  $\delta$  7.61 (dt,  $J = 7.9, 1.0$  Hz, 1H), 7.32 (dd,  $J = 8.4, 1.1$  Hz, 1H), 7.20 – 7.16 (m, 1H), 7.16 – 7.13 (m, 1H), 7.08 (ddd,  $J = 7.9, 6.9, 1.0$  Hz, 1H), 6.48 (dd,  $J = 3.3, 0.9$  Hz, 1H), 4.57 (hept,  $J = 6.7$  Hz, 1H), 1.43 (d,  $J = 6.8$  Hz, 6H).

### *N*-Br methyl phenylsulfoximine (2a)

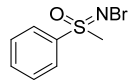

According to the general procedure (GP) for the preparation of *N*-bromosulfoximines, the *N*-Br methyl phenylsulfoximine was prepared as yellow oil in 76% yield.  $^1\text{H}$  NMR (400 MHz, chloroform-*d*)  $\delta$  7.94-7.88 (m, 2H), 7.73-7.66 (m, 1H), 7.65-7.58 (m, 2H), 3.30 (s, 3H).

### *N*-Br methyl *p*-tolylsulfoximine (2b)

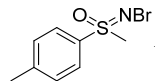

According to the general procedure (GP) for the preparation of *N*-bromosulfoximines, the *N*-Br methyl *p*-tolylsulfoximine was prepared as yellow solid in 81% yield.  $^1\text{H}$  NMR (400 MHz, chloroform-*d*)  $\delta$  7.80 (d,  $J = 8.0$  Hz, 2H), 7.40 (d,  $J = 8.0$  Hz, 2H), 3.26 (s, 3H), 2.47 (s, 3H).

### *N*-Br methyl 4-chlorophenylsulfoximine (2c)

According to the general procedure (GP) for the preparation of *N*-bromosulfoximines,

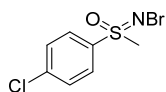

the *N*-Br methyl 4-chlorophenylsulfoximine was prepared as yellow solid in 90% yield.  $^1\text{H}$  NMR (400 MHz, chloroform-*d*)  $\delta$  7.85 (d,  $J$  = 8.6 Hz, 2H), 7.60 (d,  $J$  = 8.6 Hz, 2H), 3.32 (s, 3H).

#### ***N*-Br methyl 4-bromophenylsulfoximine (2d)**

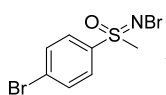

According to the general procedure (GP) for the preparation of *N*-bromosulfoximines, the *N*-Br methyl 4-bromophenylsulfoximine was prepared as yellow solid in 86% yield.  $^1\text{H}$  NMR (400 MHz, chloroform-*d*)  $\delta$  7.77 (s, 4H), 3.31 (s, 3H).

#### ***N*-Br methyl 4-nitrophenylsulfoximine (2e)**

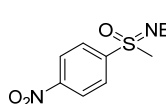

According to the general procedure (GP) for the preparation of *N*-bromosulfoximines, the *N*-Br methyl 4-nitrophenylsulfoximine was prepared as yellow solid in 52% yield.  $^1\text{H}$  NMR (400 MHz, chloroform-*d*)  $\delta$  8.49-8.44 (m, 2H), 8.15-8.10 (m, 2H), 3.38 (s, 3H).

#### ***N*-Br methyl 3-bromophenylsulfoximine (2f)**

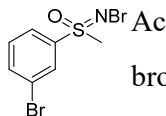

According to the general procedure (GP) for the preparation of *N*-bromosulfoximines, the *N*-Br methyl 3-bromophenylsulfoximine was prepared as yellow solid in 87% yield.  $^1\text{H}$  NMR (400 MHz, chloroform-*d*)  $\delta$  8.06 (t,  $J$  = 1.8 Hz, 1H), 7.83 (dddd,  $J$  = 8.1, 7.2, 1.9, 1.0 Hz, 2H), 7.54-7.47 (m, 1H), 3.32 (s, 3H).

#### ***N*-Br methyl 3-chlorophenylsulfoximine (2g)**

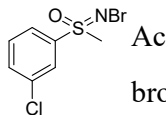

According to the general procedure (GP) for the preparation of *N*-bromosulfoximines, the *N*-Br methyl 3-chlorophenylsulfoximine was prepared as yellow solid in 72% yield.  $^1\text{H}$  NMR (400 MHz, chloroform-*d*)  $\delta$  7.92-7.90 (m, 1H), 7.80 (ddd,  $J$  = 7.8, 1.8, 1.1 Hz, 1H), 7.67 (ddd,  $J$  = 8.0, 2.1, 1.1 Hz, 1H), 7.60-7.55 (m, 1H), 3.32 (s, 3H).

#### ***N*-Br methyl 2-bromophenylsulfoximine (2h)**

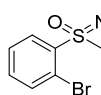

According to the general procedure (GP) for the preparation of *N*-bromosulfoximines, the *N*-Br methyl 2-bromophenylsulfoximine was prepared as yellow solid in 82% yield.  $^1\text{H}$  NMR (400 MHz, chloroform-*d*)  $\delta$  8.24 (dd,  $J = 7.9, 1.8$  Hz, 1H), 7.81 (dd,  $J = 7.8, 1.4$  Hz, 1H), 7.62-7.55 (m, 1H), 7.51 (td,  $J = 7.6, 1.8$  Hz, 1H), 3.52 (s, 3H).

#### ***N*-Br methyl 2-chlorophenylsulfoximine (2i)**

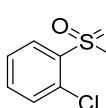

According to the general procedure (GP) for the preparation of *N*-bromosulfoximines, the *N*-Br methyl 2-chlorophenylsulfoximine was prepared as yellow solid in 78% yield.  $^1\text{H}$  NMR (400 MHz, chloroform-*d*)  $\delta$  8.19 (ddd,  $J = 7.9, 1.6, 0.5$  Hz, 1H), 7.64 – 7.58 (m, 2H), 7.54 (ddd,  $J = 7.9, 6.7, 2.0$  Hz, 1H), 3.51 (s, 3H).

#### ***N*-Br diphenylsulfoximine (2j)**

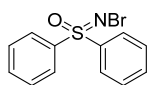

According to the general procedure (GP) for the preparation of *N*-bromosulfoximines, the *N*-Br diphenylsulfoximine was prepared as yellow solid in 72% yield.  $^1\text{H}$  NMR (400 MHz, chloroform-*d*)  $\delta$  8.01-7.96 (m, 4H), 7.63-7.51 (m, 6H).

#### ***N*-Br isopropyl phenylsulfoximine (2k)**

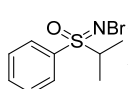

According to the general procedure (GP) for the preparation of *N*-bromosulfoximines, the *N*-Br isopropyl phenylsulfoximine was prepared as yellow solid in 57% yield.  $^1\text{H}$  NMR (400 MHz, chloroform-*d*)  $\delta$  7.88-7.81 (m, 2H), 7.73-7.67 (m, 1H), 7.65-7.58 (m, 2H), 3.62 (p,  $J = 6.9$  Hz, 1H), 1.47-1.40 (m, 3H), 1.28 (dd,  $J = 6.9, 1.0$  Hz, 3H).

#### ***N*-Br butyl phenylsulfoximine (2l)**

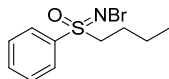

According to the general procedure (GP) for the preparation of *N*-bromosulfoximines, the *N*-Br butyl phenylsulfoximine was prepared as yellow oil in 52% yield.  $^1\text{H}$  NMR (400 MHz, chloroform-*d*)  $\delta$  7.88 (d,  $J = 7.5$  Hz, 2H), 7.70 (t,  $J = 7.4$  Hz, 1H), 7.62 (t,  $J = 7.6$  Hz, 2H), 3.40 (dddd,  $J = 51.1, 14.0, 11.0, 5.2$  Hz, 2H), 1.87-1.57 (m, 2H), 1.44-1.32 (m, 2H), 0.89 (t,  $J = 7.4$  Hz, 3H).

### ***N*-Br dibutylsulfoximine (2m)**

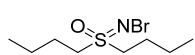

According to the general procedure (GP) for the preparation of *N*-bromosulfoximines, the *N*-Br dibutylsulfoximine was prepared as yellow oil in 39% yield. <sup>1</sup>H NMR (400 MHz, chloroform-*d*)  $\delta$  3.21 (hept,  $J = 7.2$  Hz, 4H), 1.75 (qd,  $J = 8.5, 6.6$  Hz, 4H), 1.45 (h,  $J = 7.4$  Hz, 4H), 0.94 (t,  $J = 7.4$  Hz, 6H).

### **4. X-Ray Crystallographic Data**

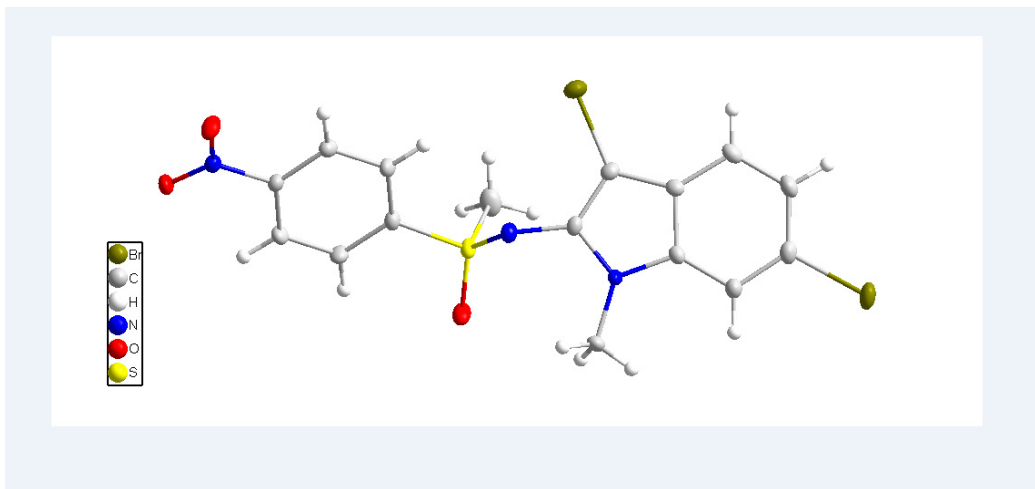

**Table S2 Crystal data and structure refinement**

|                     |                                                                                 |
|---------------------|---------------------------------------------------------------------------------|
| Identification code | 3bd                                                                             |
| Empirical formula   | C <sub>16</sub> H <sub>13</sub> Br <sub>2</sub> N <sub>3</sub> O <sub>3</sub> S |
| Formula weight      | 487.17                                                                          |
| Temperature/K       | 293(2)                                                                          |
| Crystal system      | monoclinic                                                                      |
| Space group         | P2 <sub>1</sub> /c                                                              |
| a/Å                 | 14.1638(2)                                                                      |
| b/Å                 | 11.04160(10)                                                                    |
| c/Å                 | 11.36030(10)                                                                    |
| $\alpha$ /°         | 90                                                                              |
| $\beta$ /°          | 90.3890(10)                                                                     |
| $\gamma$ /°         | 90                                                                              |

|                                             |                                                               |
|---------------------------------------------|---------------------------------------------------------------|
| Volume/Å <sup>3</sup>                       | 1776.61(3)                                                    |
| Z                                           | 4                                                             |
| $\rho_{\text{calc}}/\text{cm}^3$            | 1.821                                                         |
| $\mu/\text{mm}^{-1}$                        | 7.080                                                         |
| F(000)                                      | 960.0                                                         |
| Radiation                                   | CuK $\alpha$ ( $\lambda = 1.54178$ )                          |
| 2 $\theta$ range for data collection/°      | 6.24 to 148.15                                                |
| Index ranges                                | $-17 \leq h \leq 17, -9 \leq k \leq 13, -14 \leq l \leq 13$   |
| Reflections collected                       | 17436                                                         |
| Independent reflections                     | 3562 [ $R_{\text{int}} = 0.0652, R_{\text{sigma}} = 0.0300$ ] |
| Data/restraints/parameters                  | 3562/0/228                                                    |
| Goodness of fit on $F^2$                    | 0.932                                                         |
| Final R indices [ $I \geq 2\sigma(I)$ ]     | $R_1 = 0.0465, wR_2 = 0.1290$                                 |
| Final R indices [all data]                  | $R_1 = 0.0467, wR_2 = 0.1293$                                 |
| Largest diff. peak/hole / e Å <sup>-3</sup> | 1.89/-1.04                                                    |

## 5. Reference

- [1] (a) Xie, Y.; Zhou, B.; Zhou, S.; Zhou, S.; Wei, W.; Liu, J.; Zhan, Y.; Cheng, D.; Chen, M.; Li, Y.; Wang, B.; Xue, X.-s.; Li, Z., *ChemistrySelect* 2017, 2, 1620; (b) Bohnen, C.; Bolm, C., *Org. Lett.* 2015, 17, 3011.
- [2] (a) Hong, X.; Tan, Q.; Liu, B.; Xu, B., *Angew. Chem. Int. Ed.* 2017, 56, 3961; (b) Antilla, J. C.; Klapars, A.; Buchwald, S. L., *J. Am. Chem. Soc.* 2002, 124, 11684.
- [3] (a) Wang, C.; Shi, P.; Bolm, C. *Org. Chem. Fron.* 2021, 8, 2919; (b) Banjare, S. K.; Nanda, T.; Pati, B. V.; Adhikari, G. K. D.; Dutta, J.; Ravikumar, P. C. *ACS Catalysis* 2021, 11, 11579; (c) Das, D.; Bhutia, Z. T.; Chatterjee, A.; Banerjee, M. *J. Org. Chem.* 2019, 84, 10764; (d) Bohnen, C.; Bolm, C. *Org. Lett.* 2015, 17, 3011.

## 7 NMR Spectra



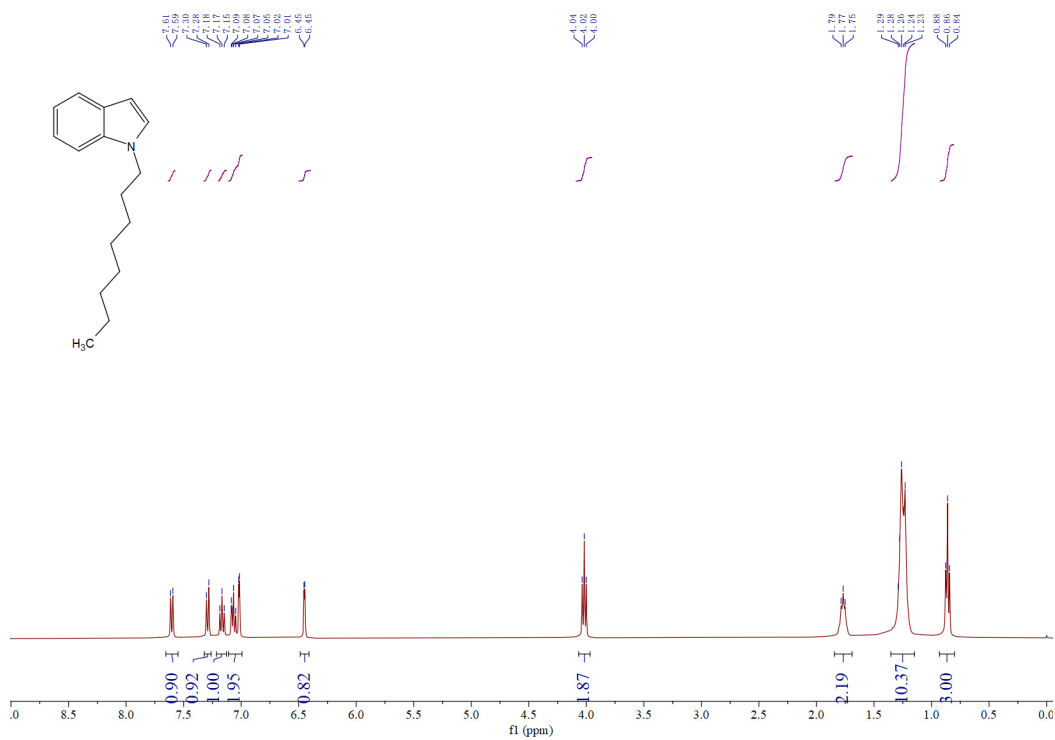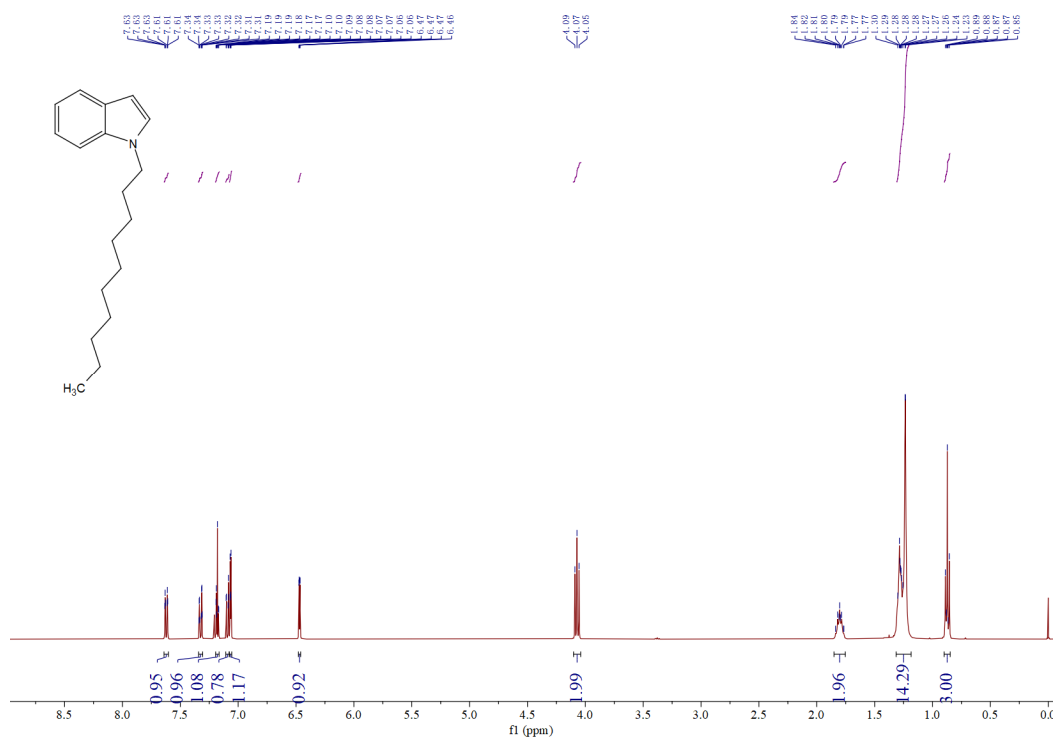

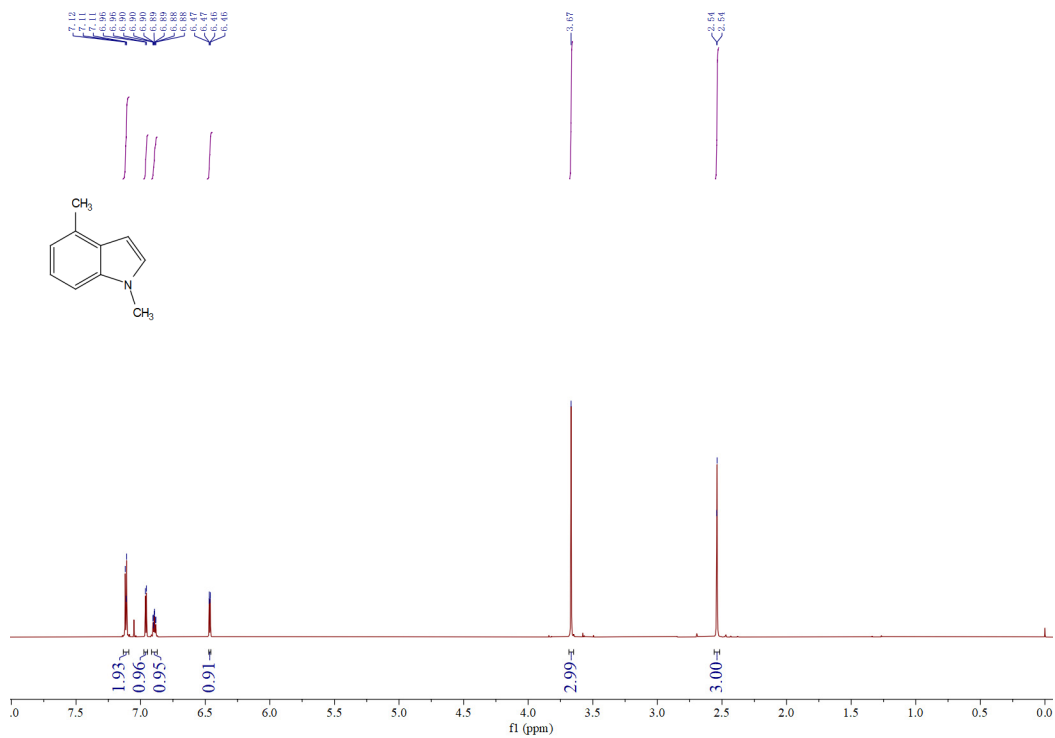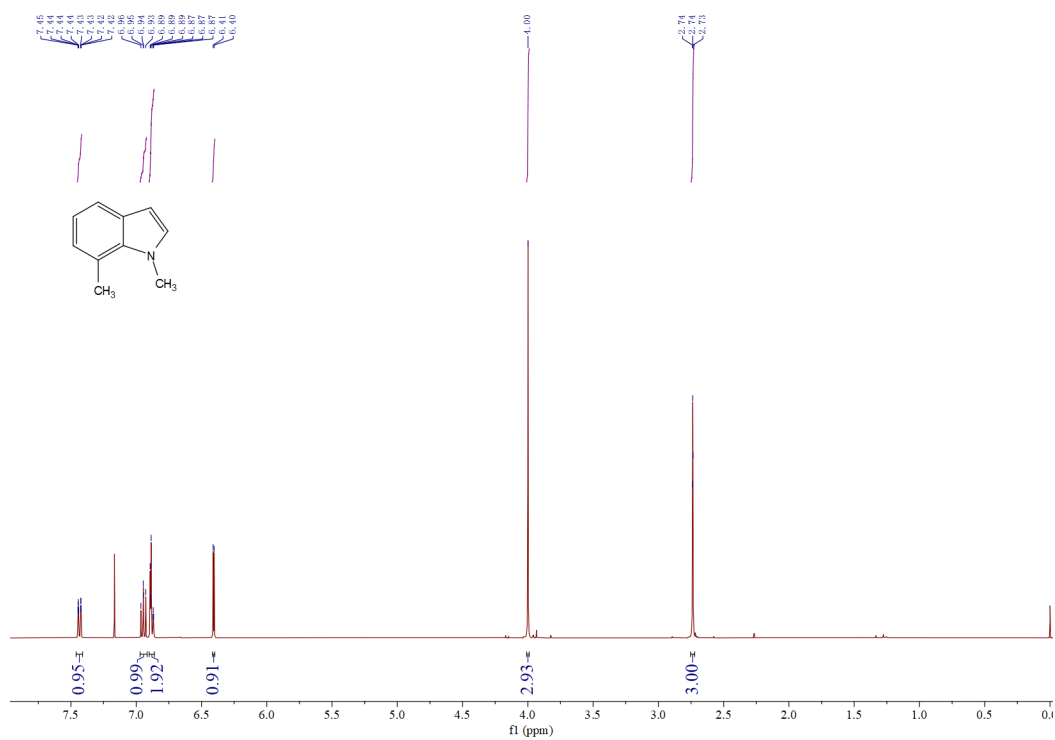





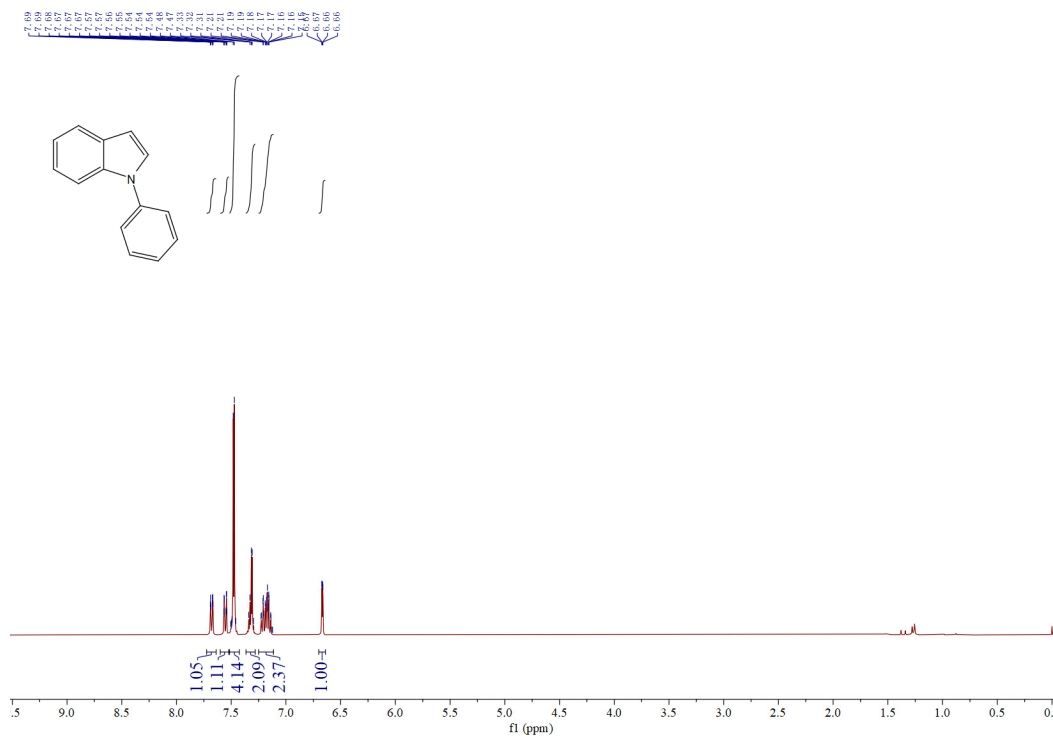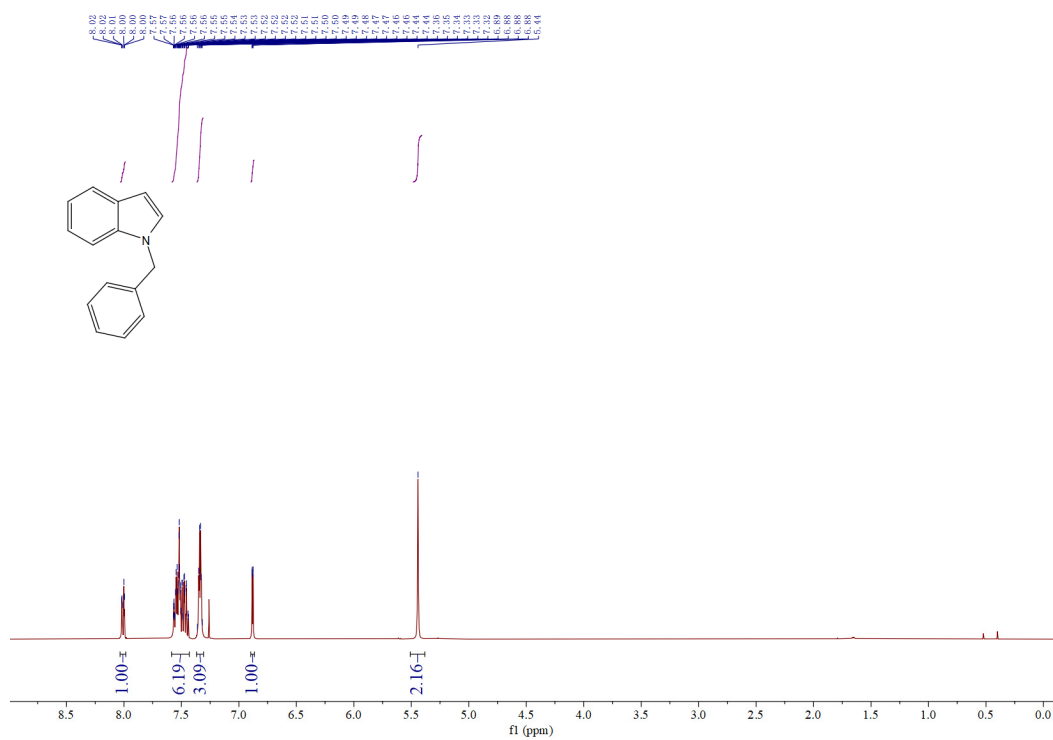

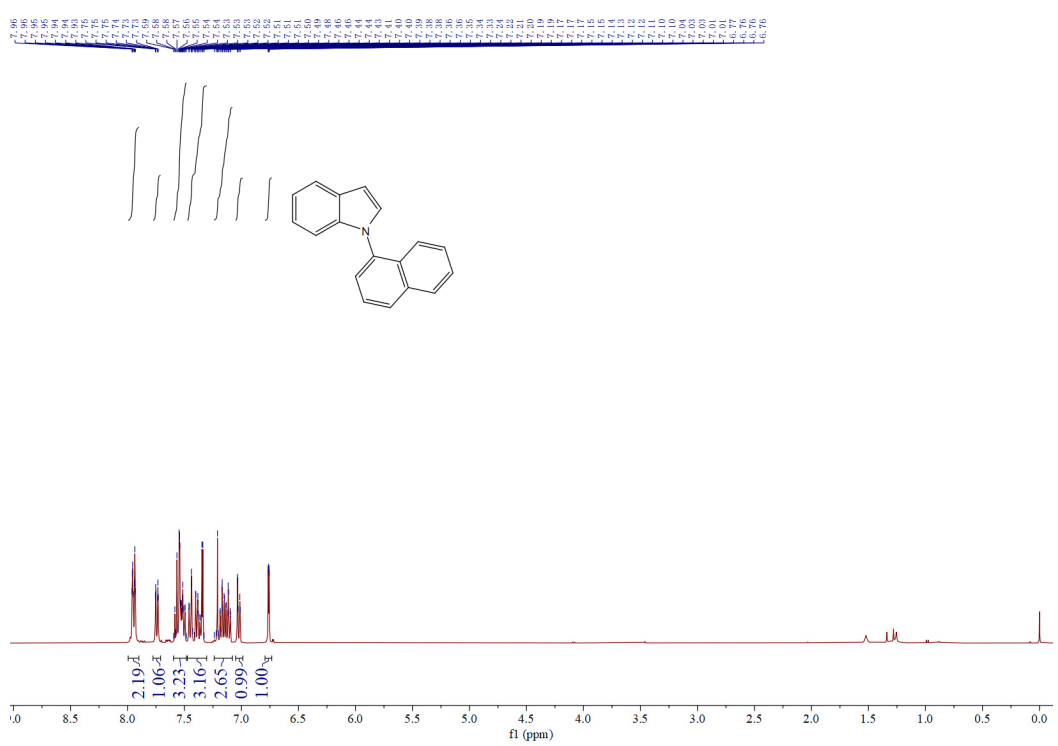

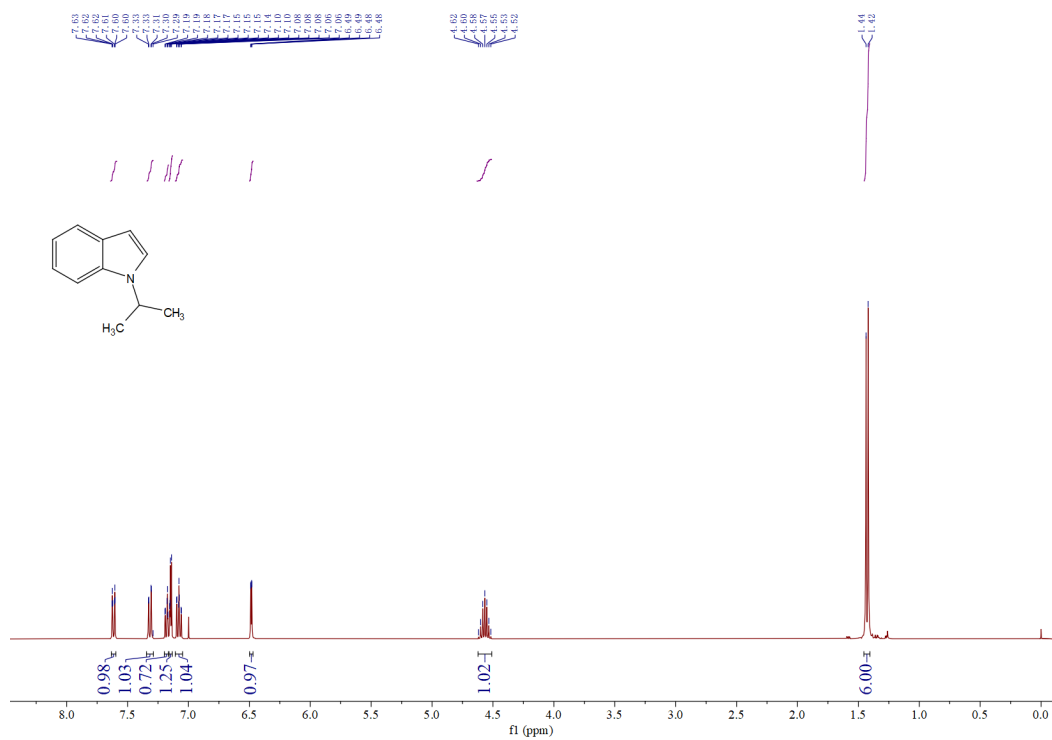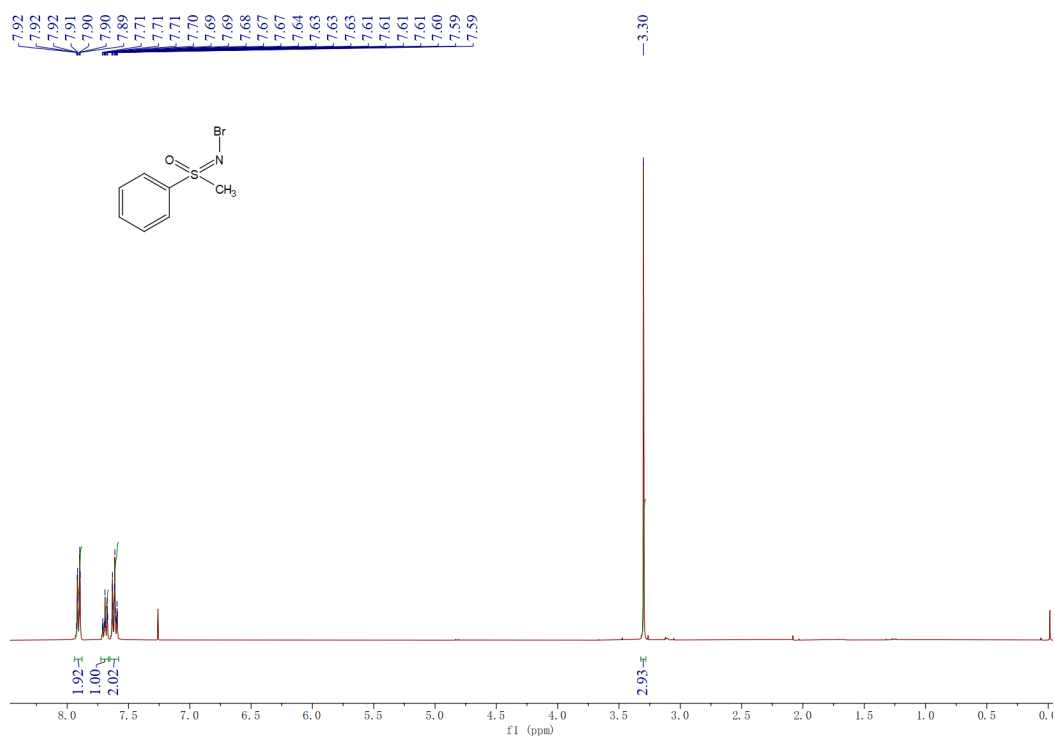

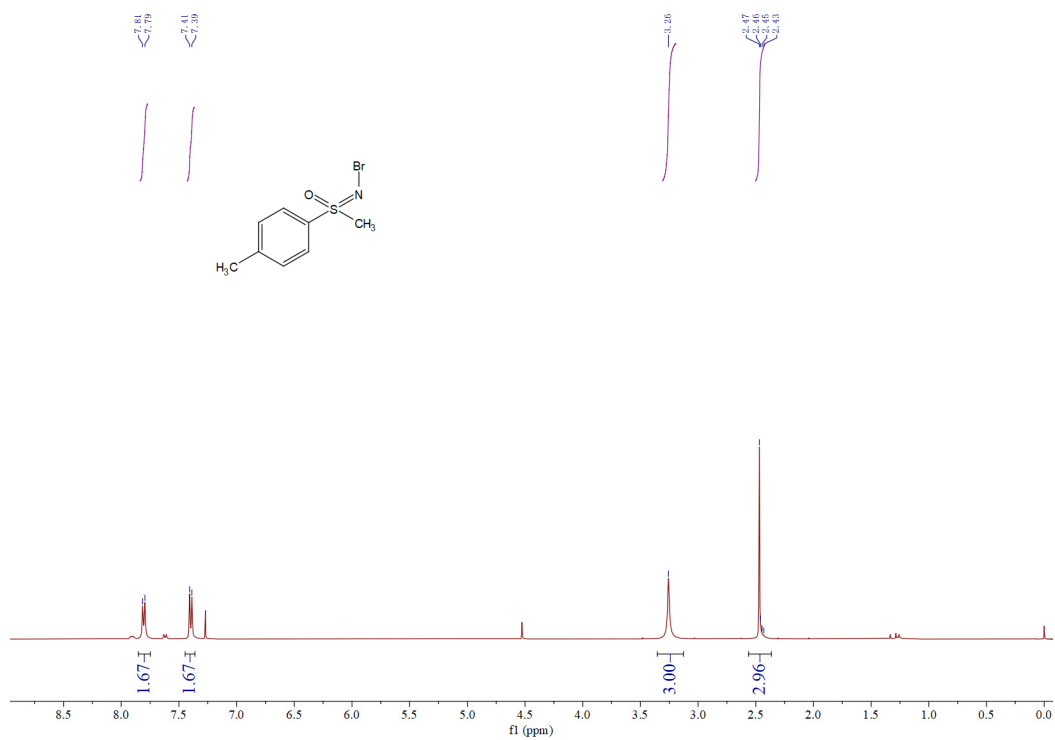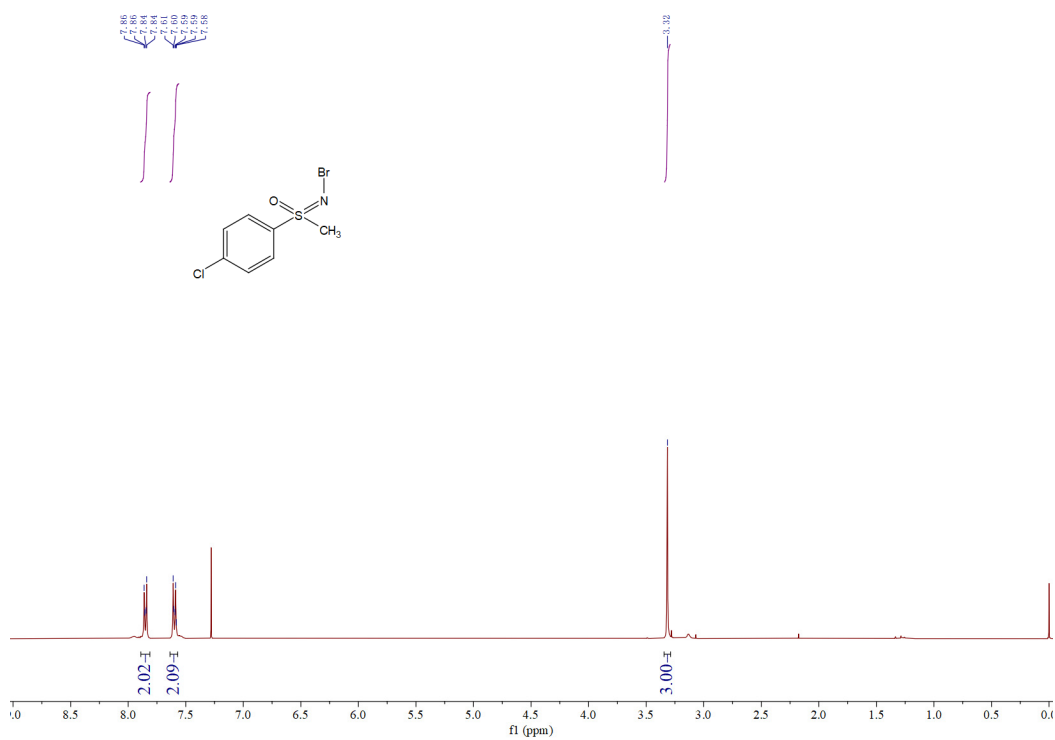

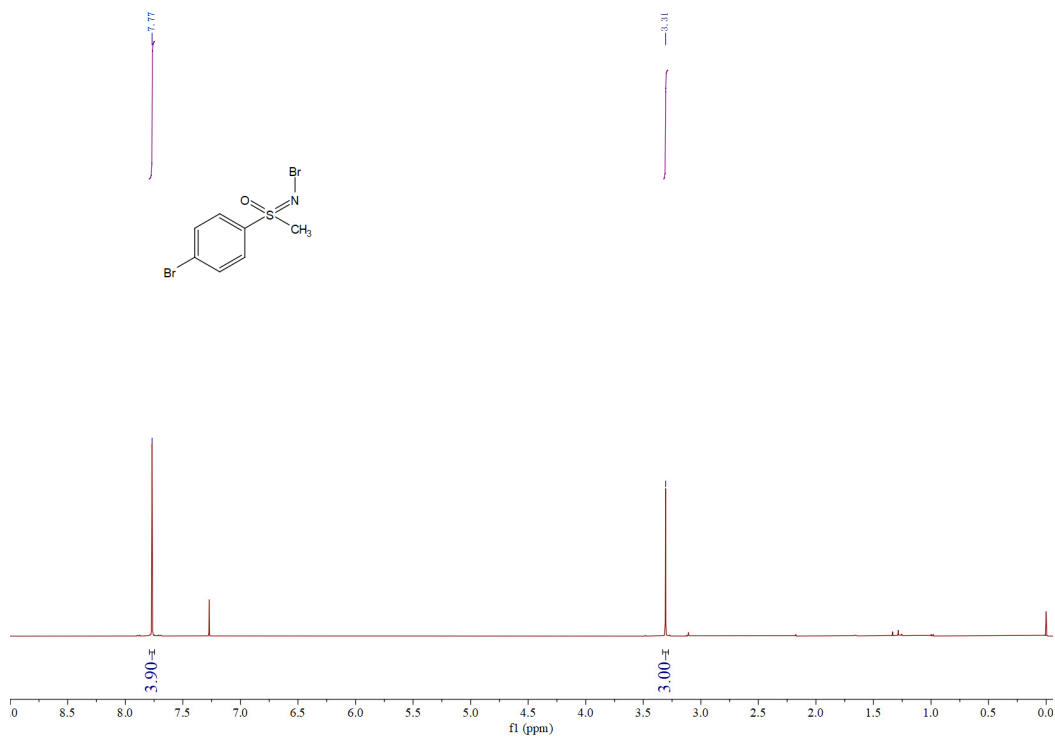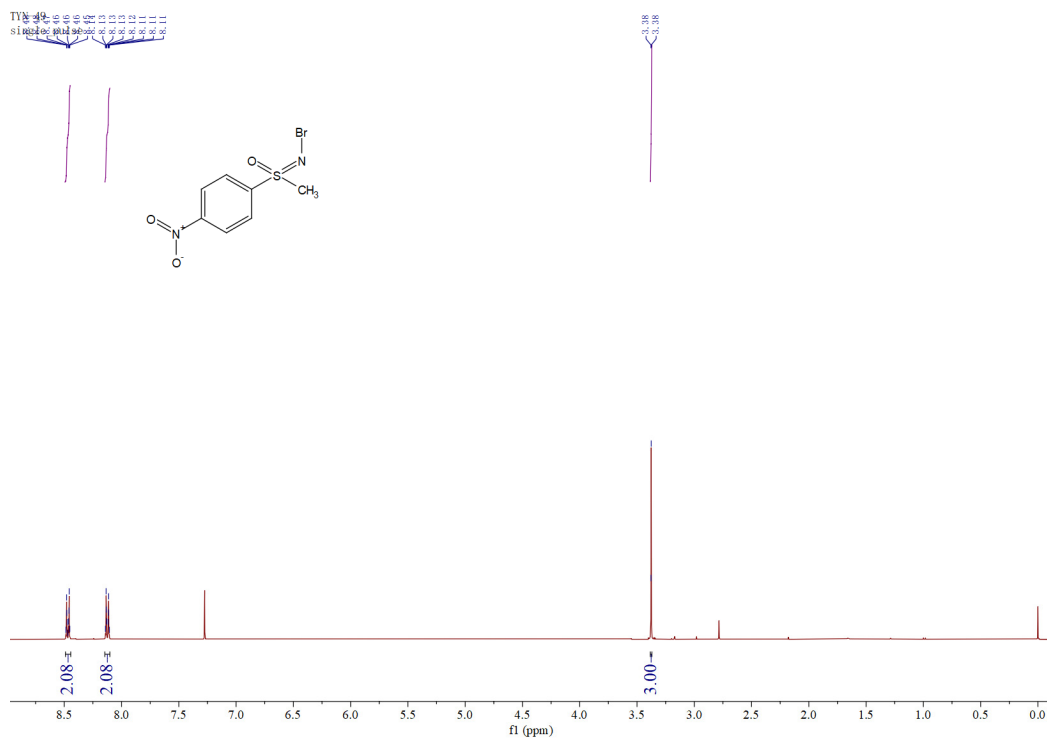



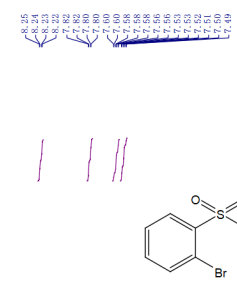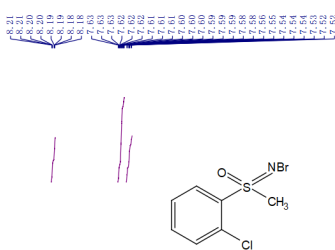



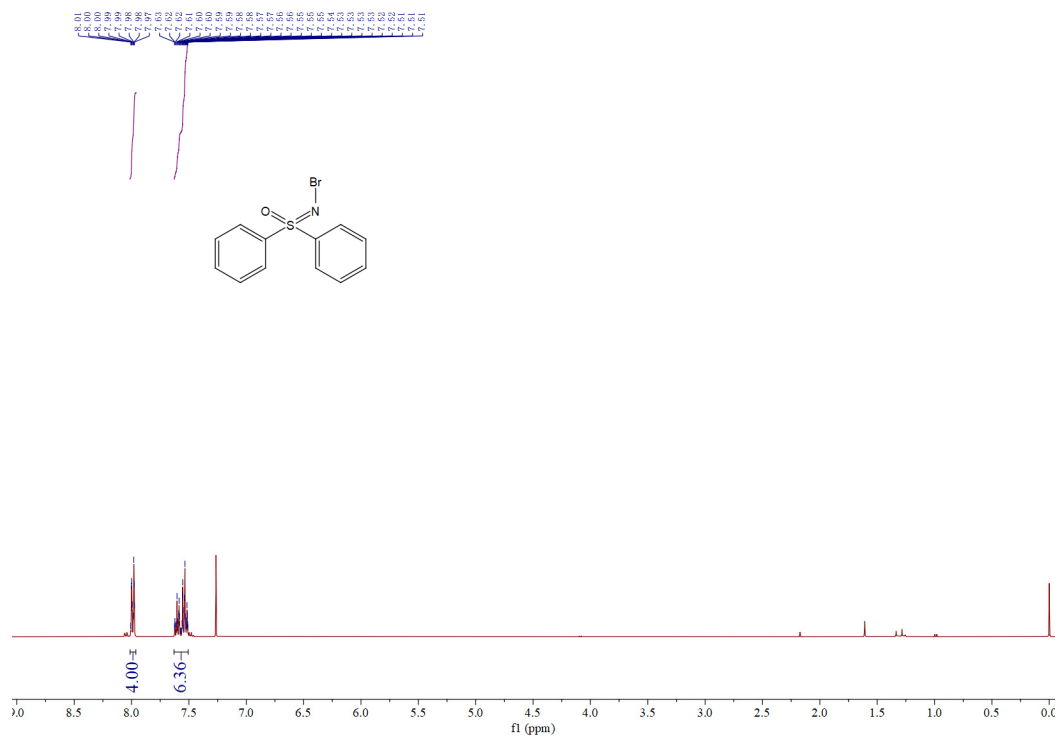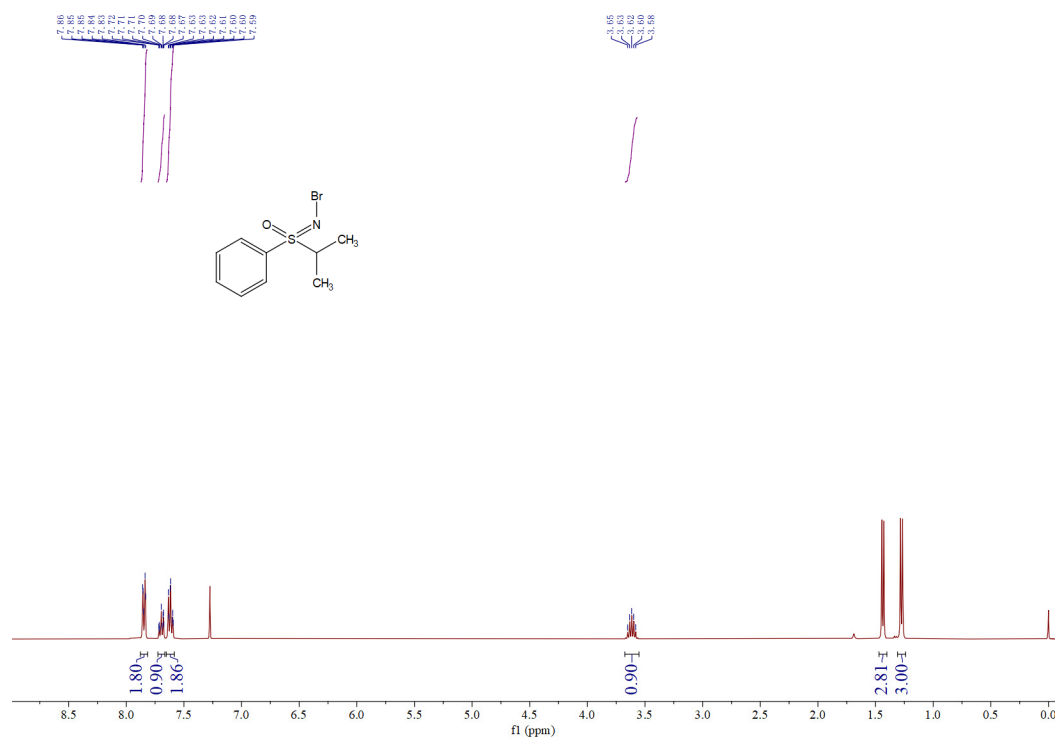



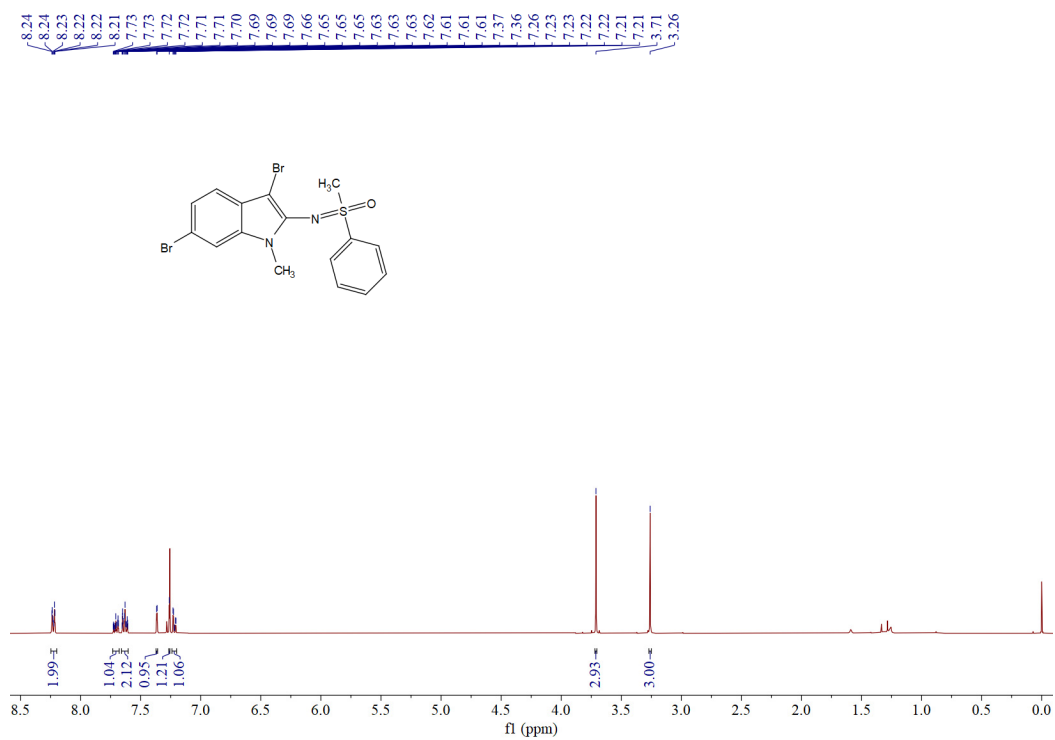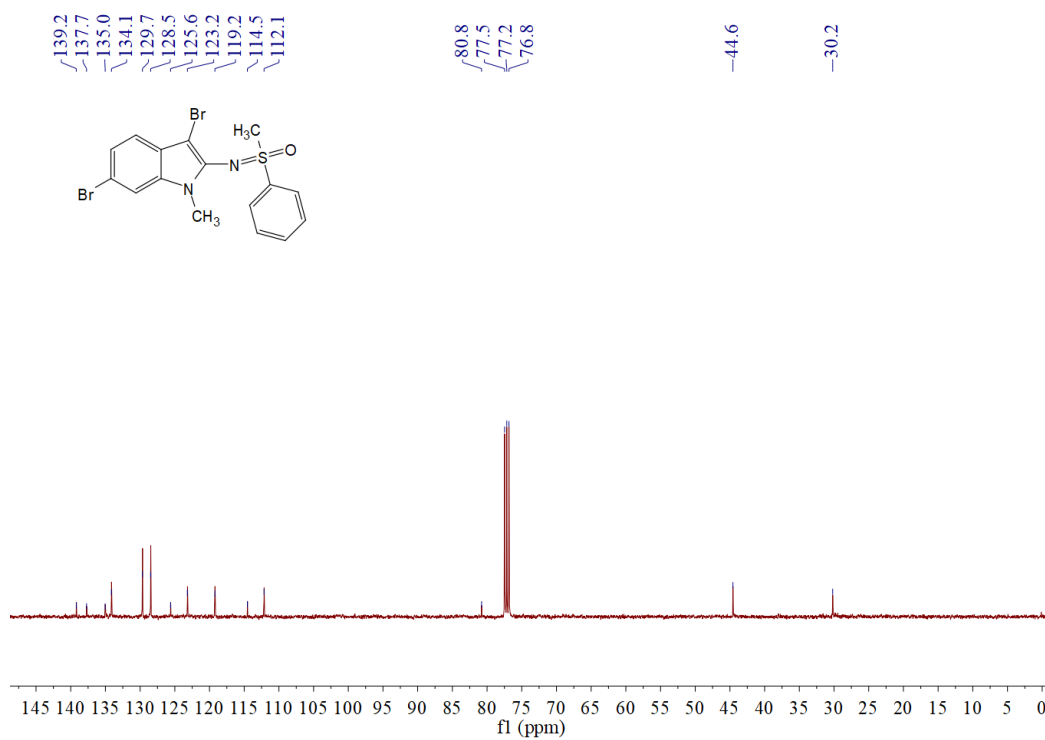

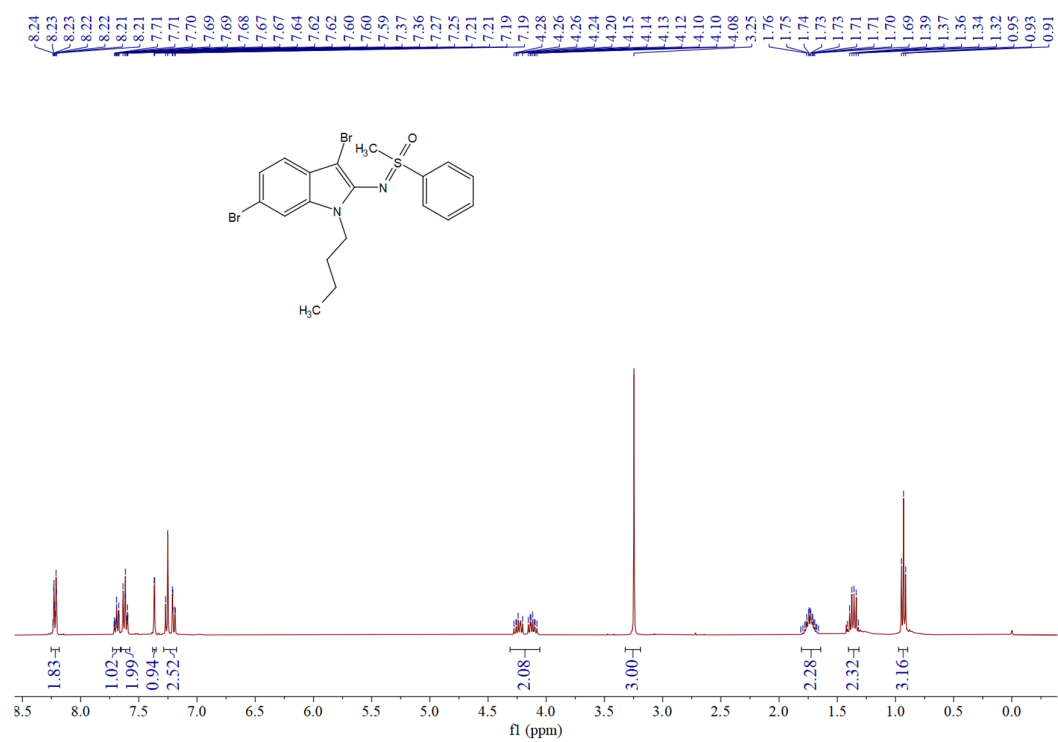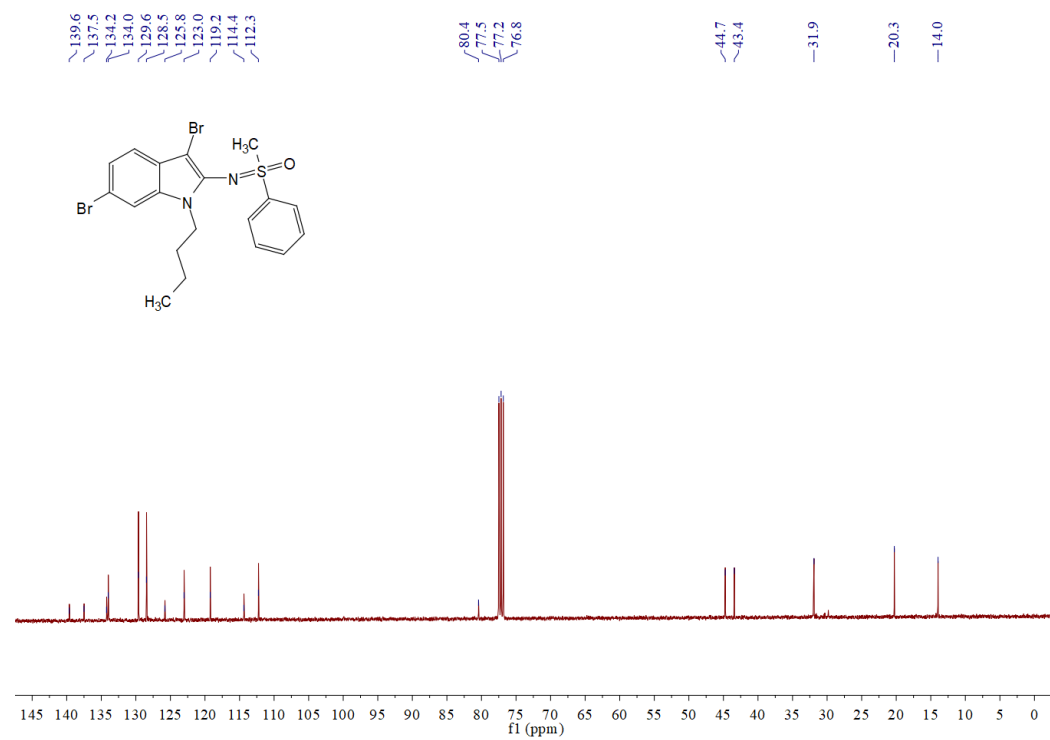

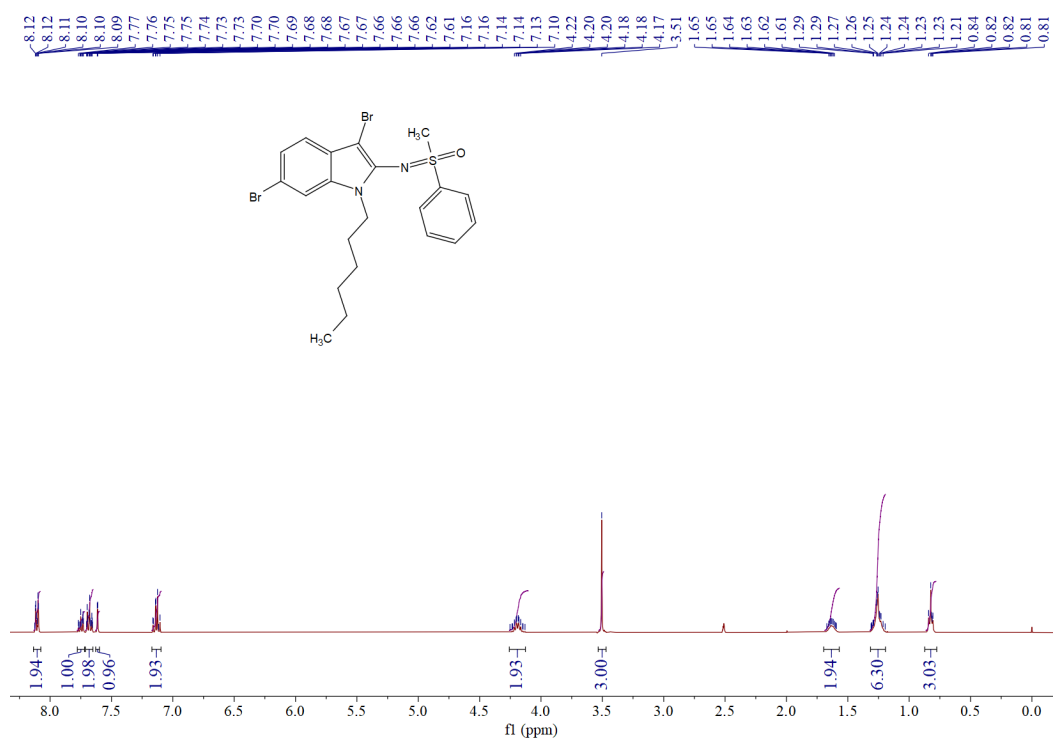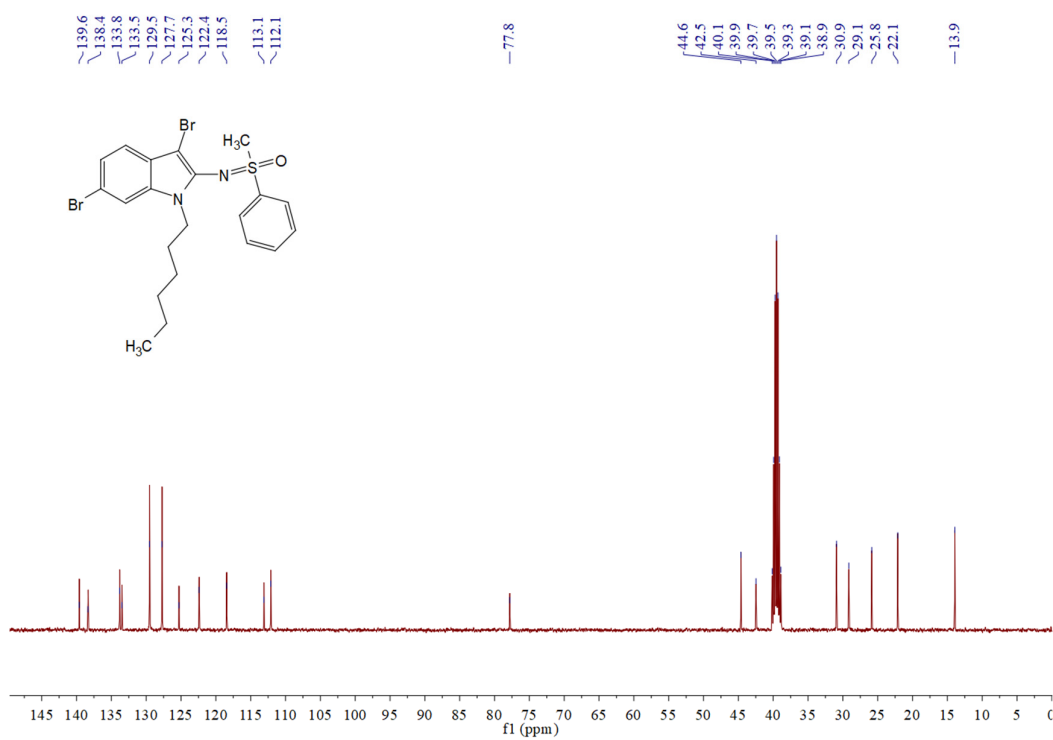

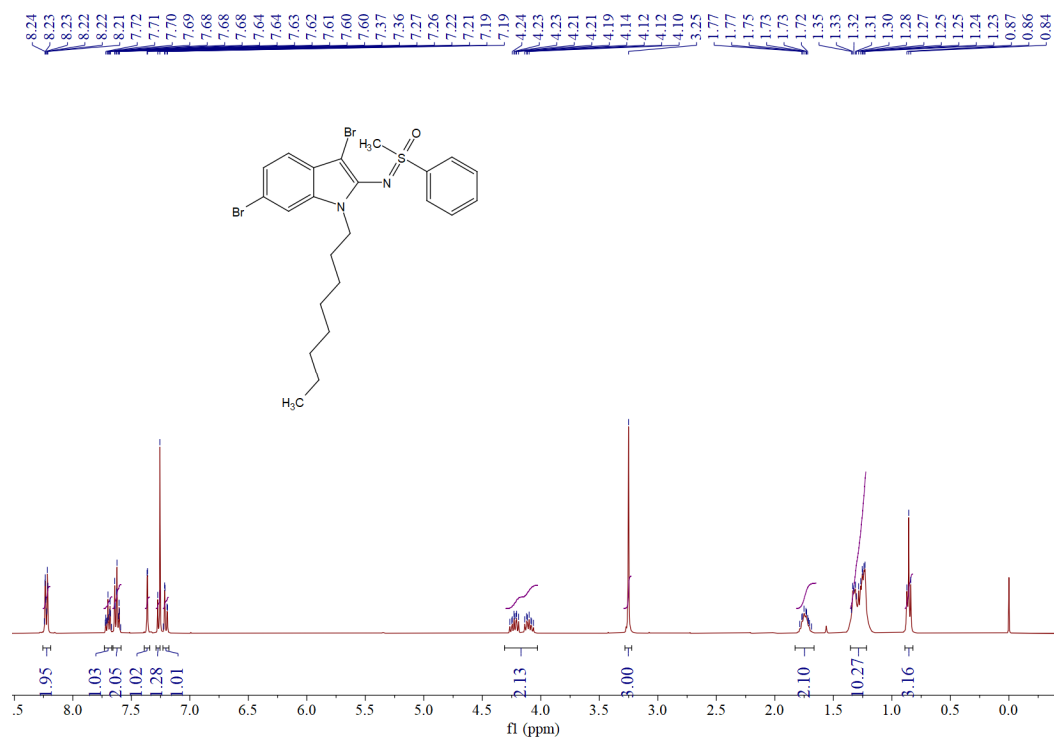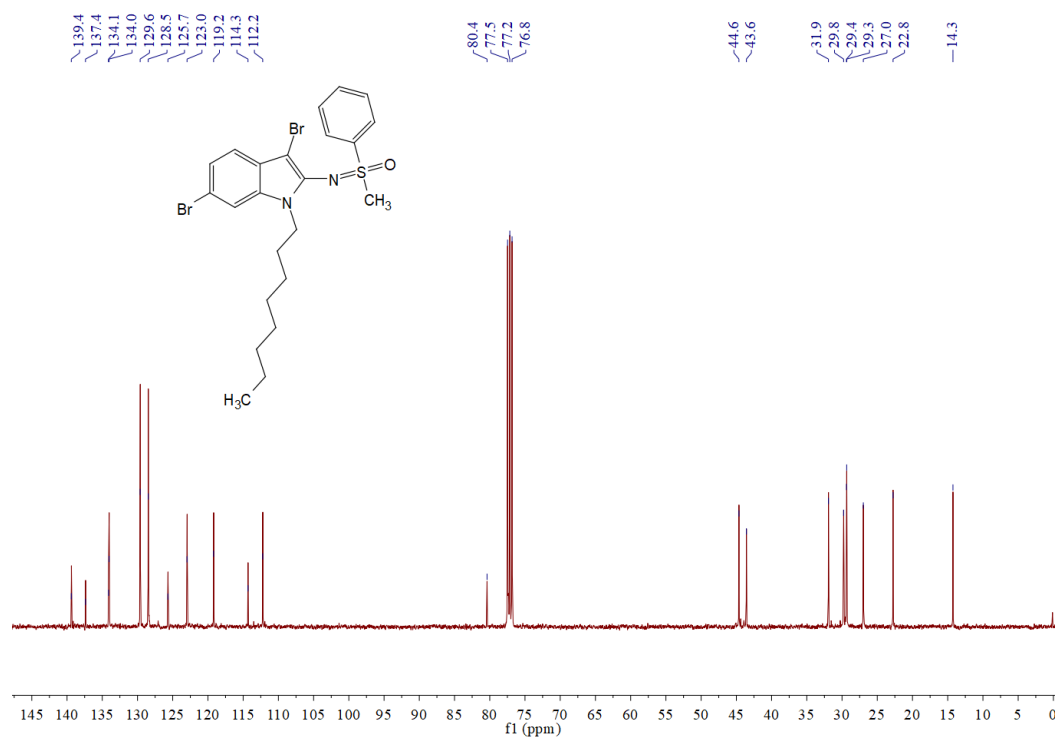

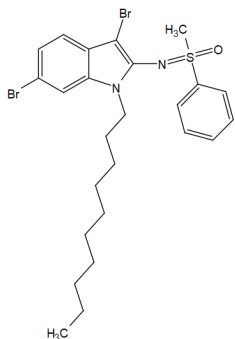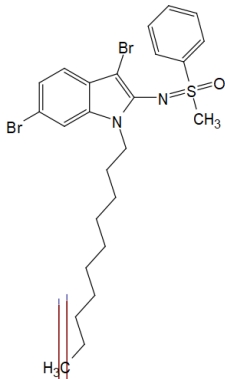

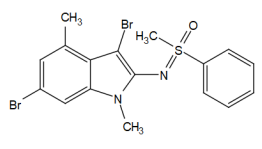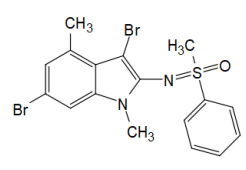



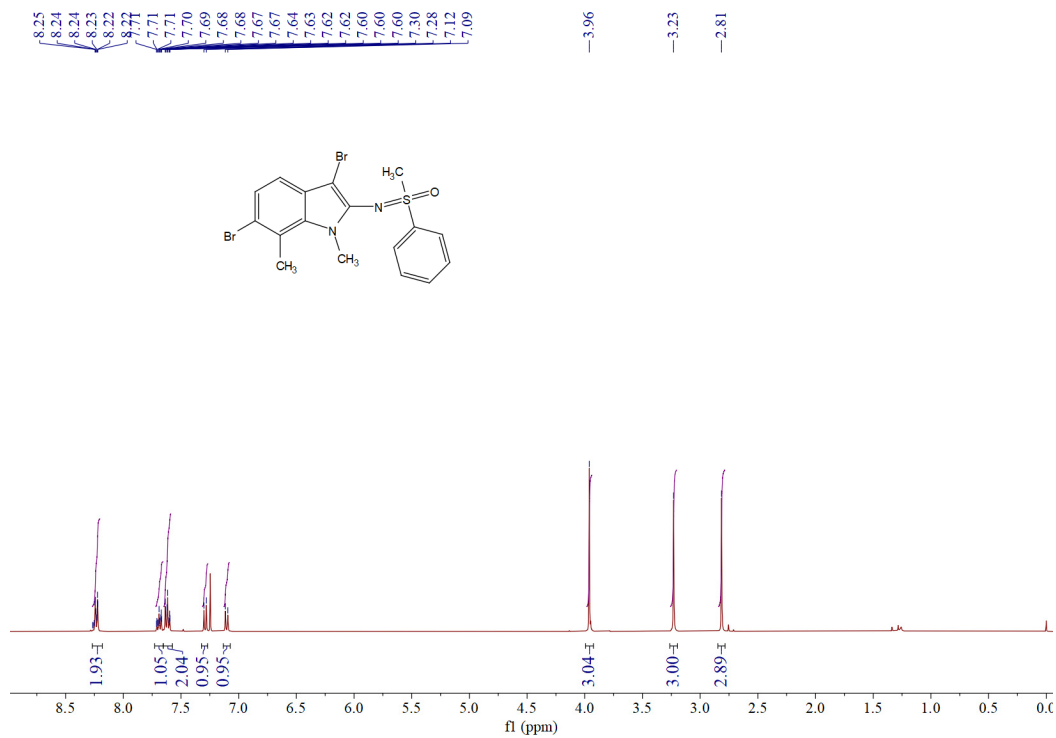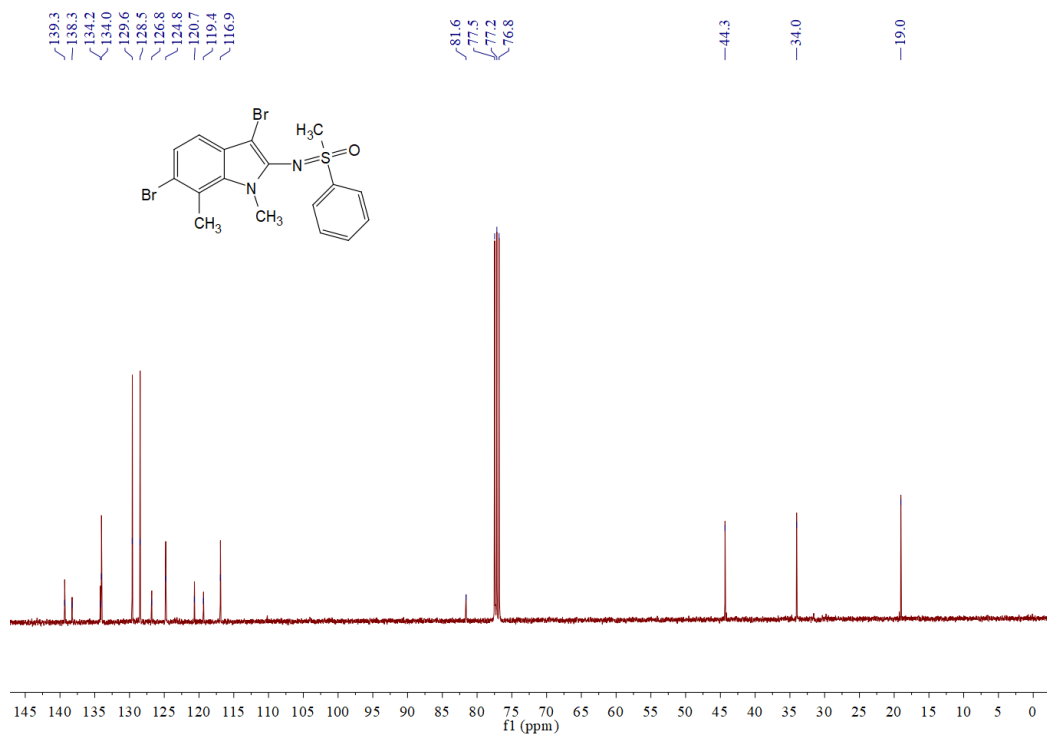

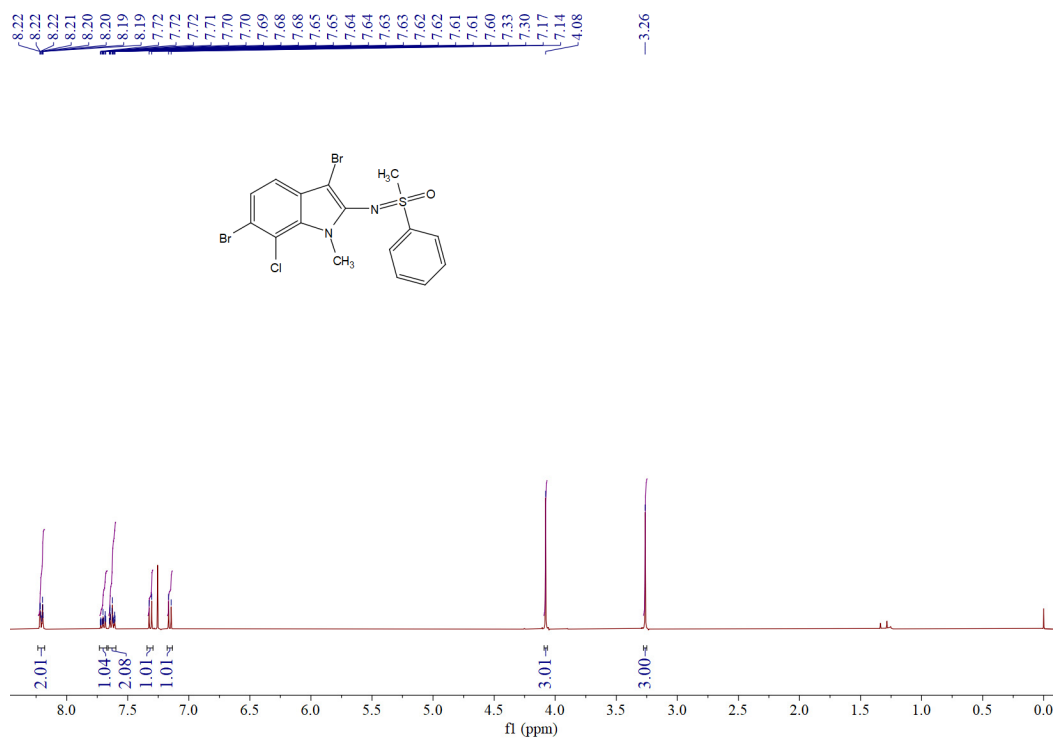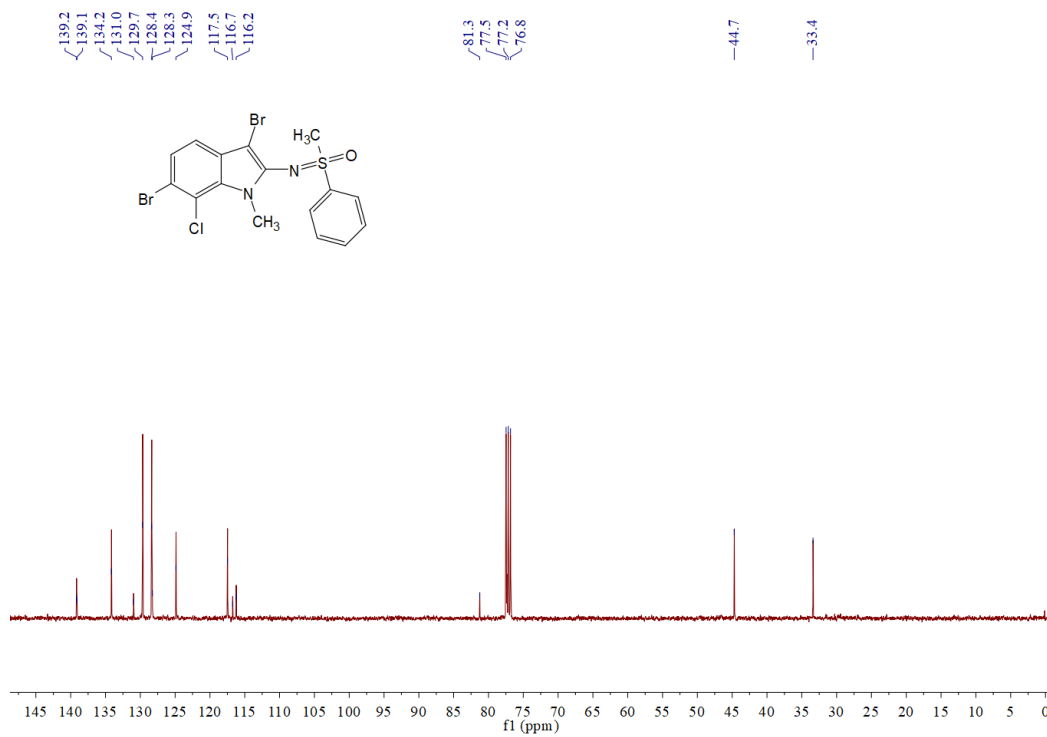

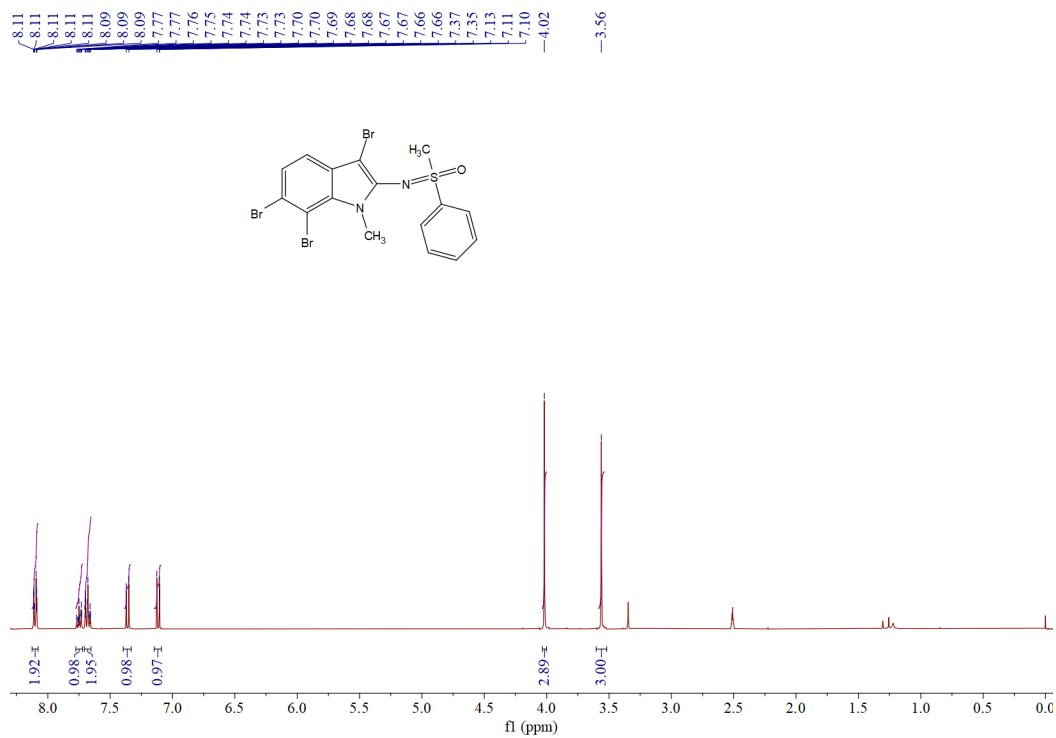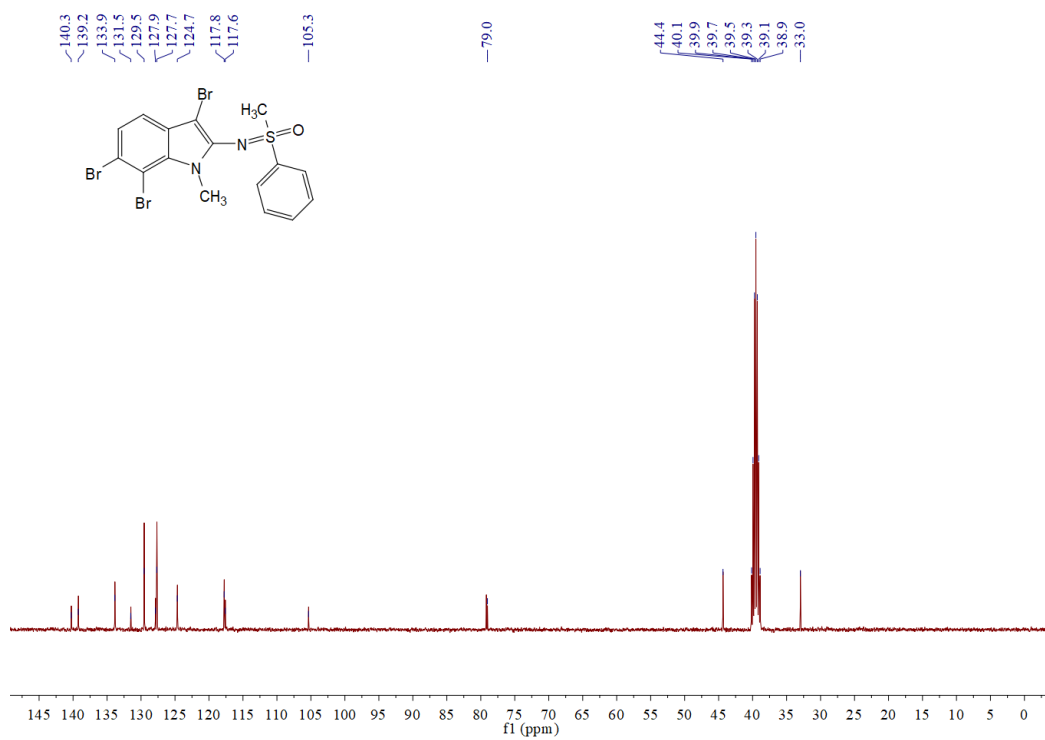

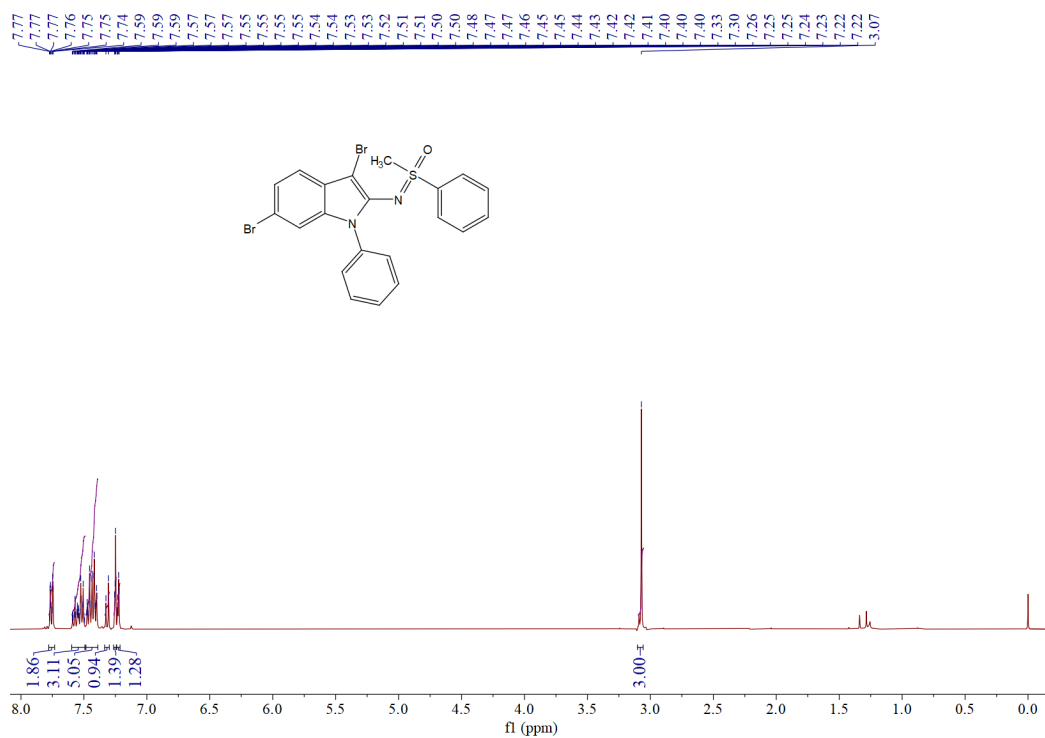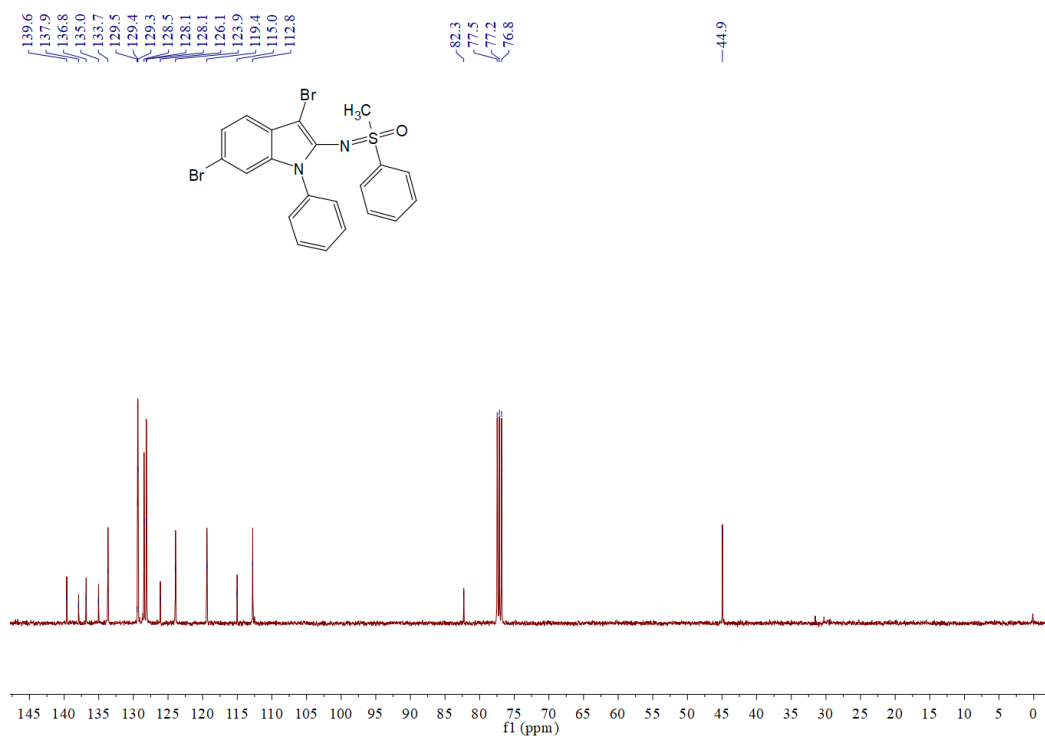

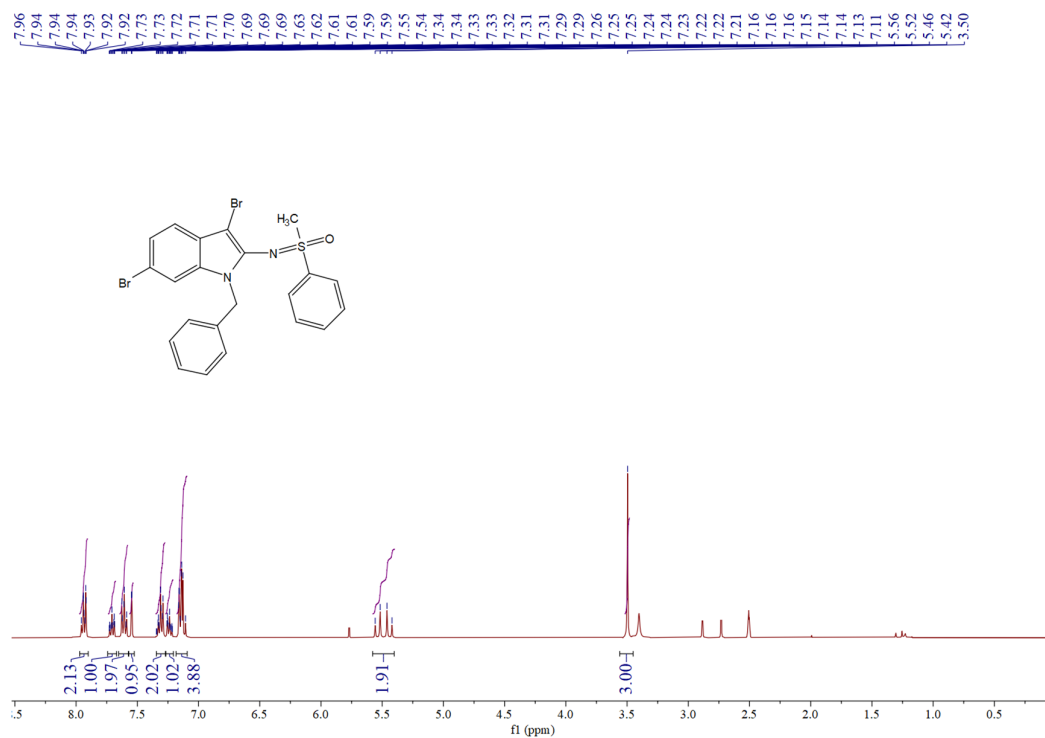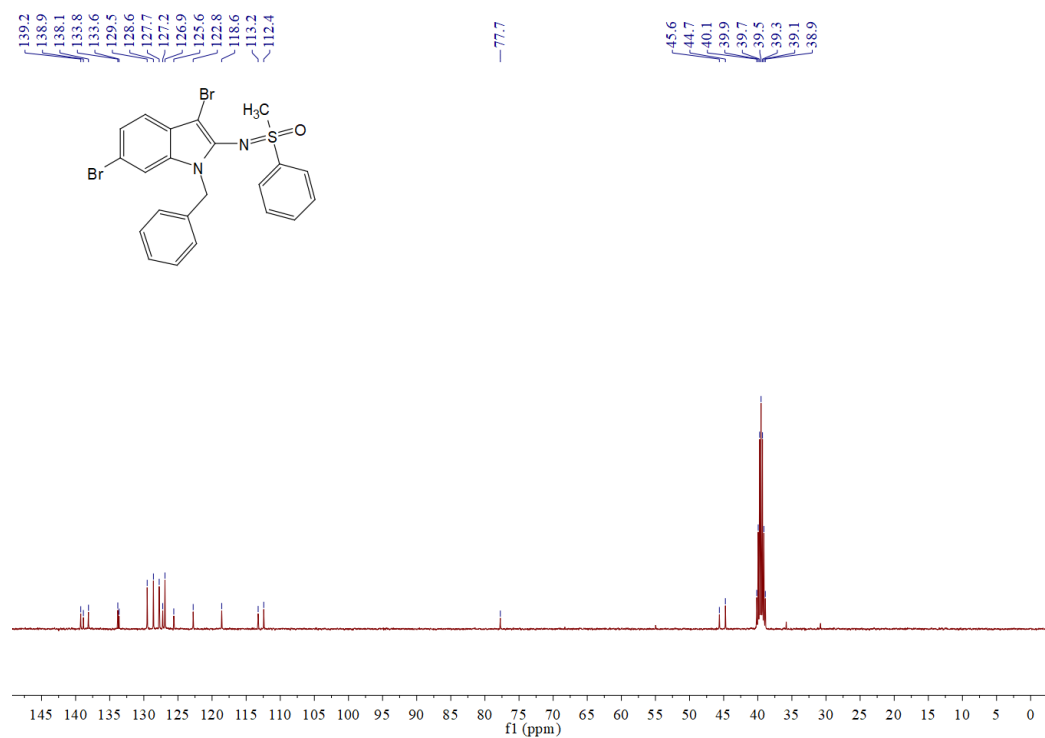

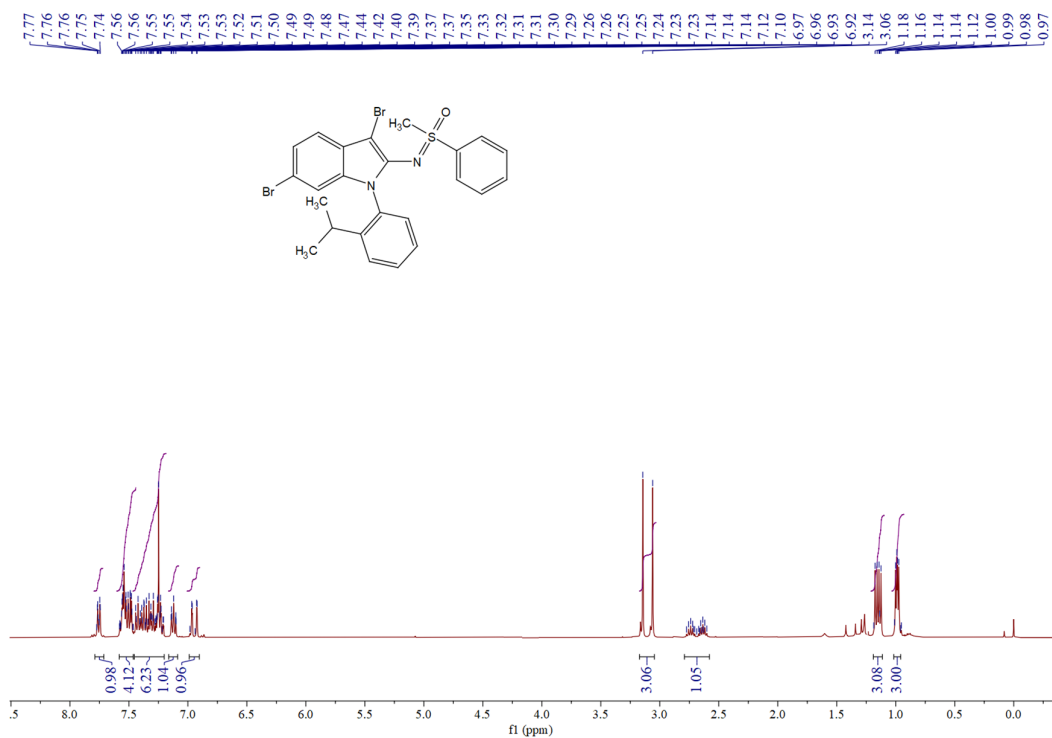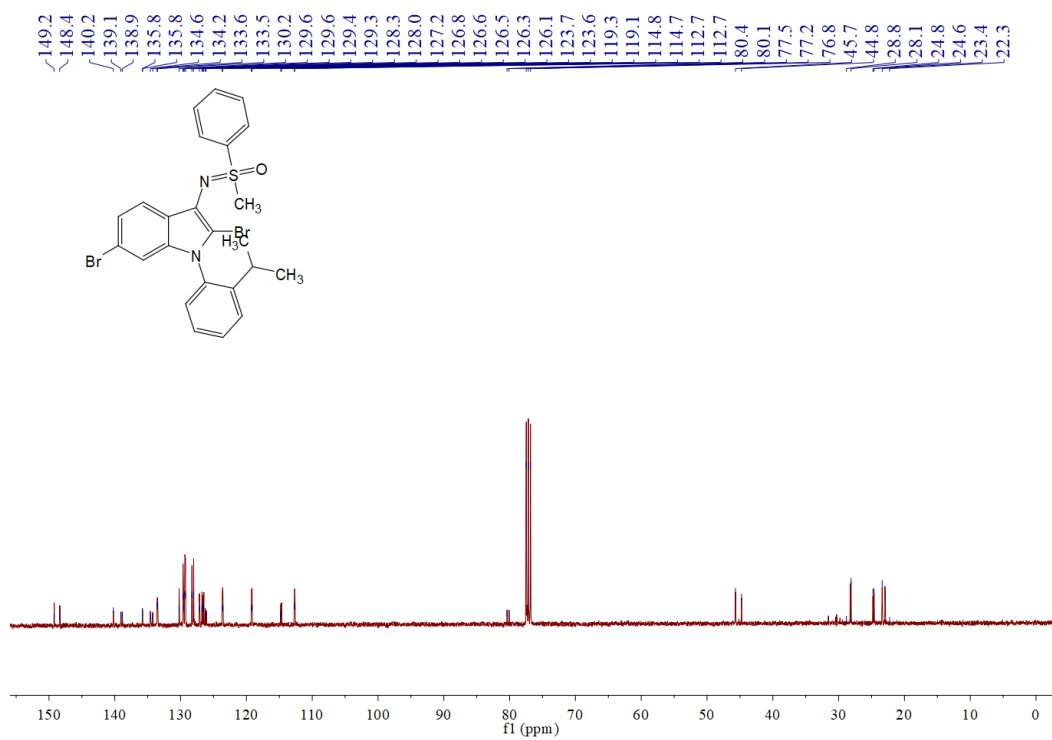

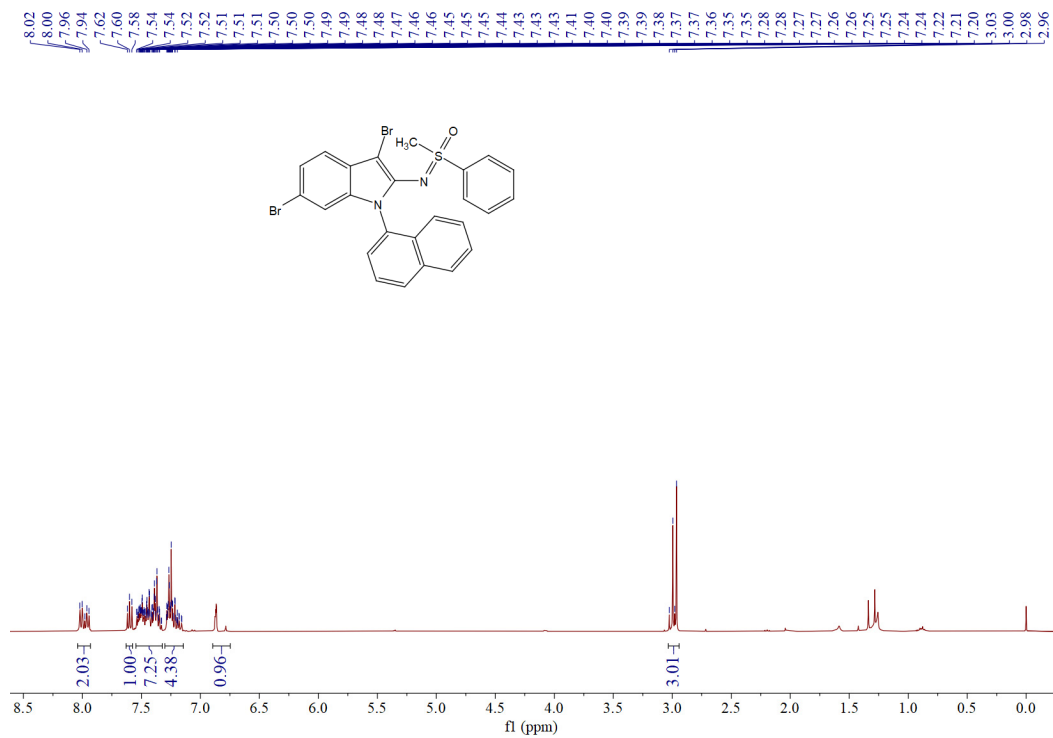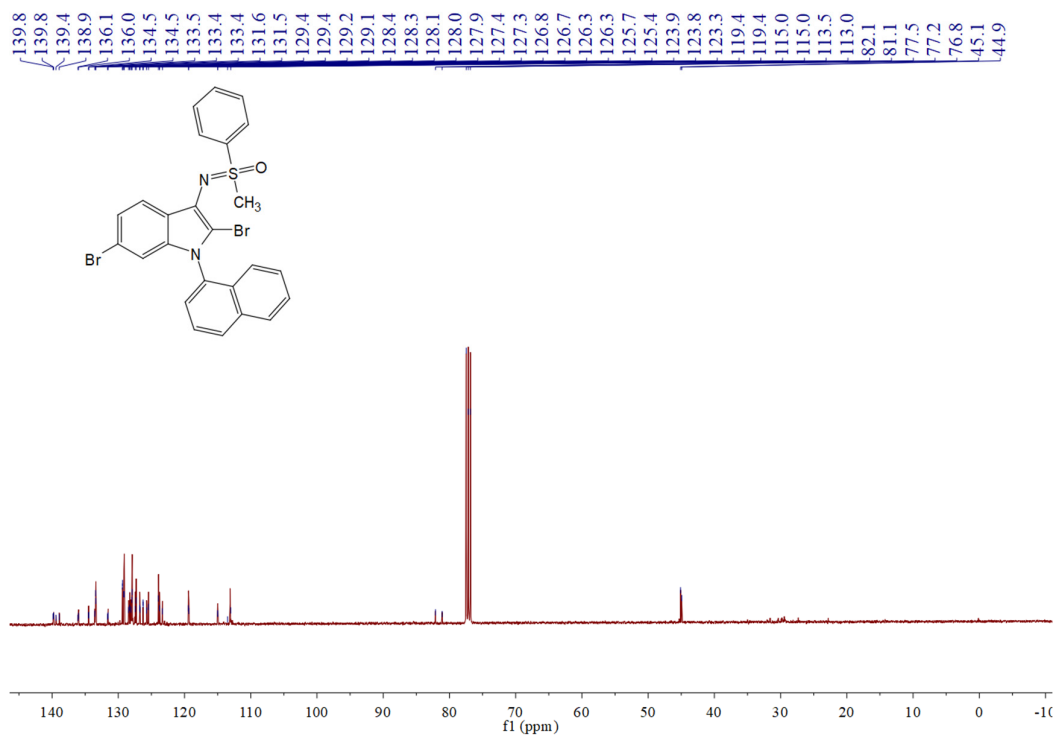

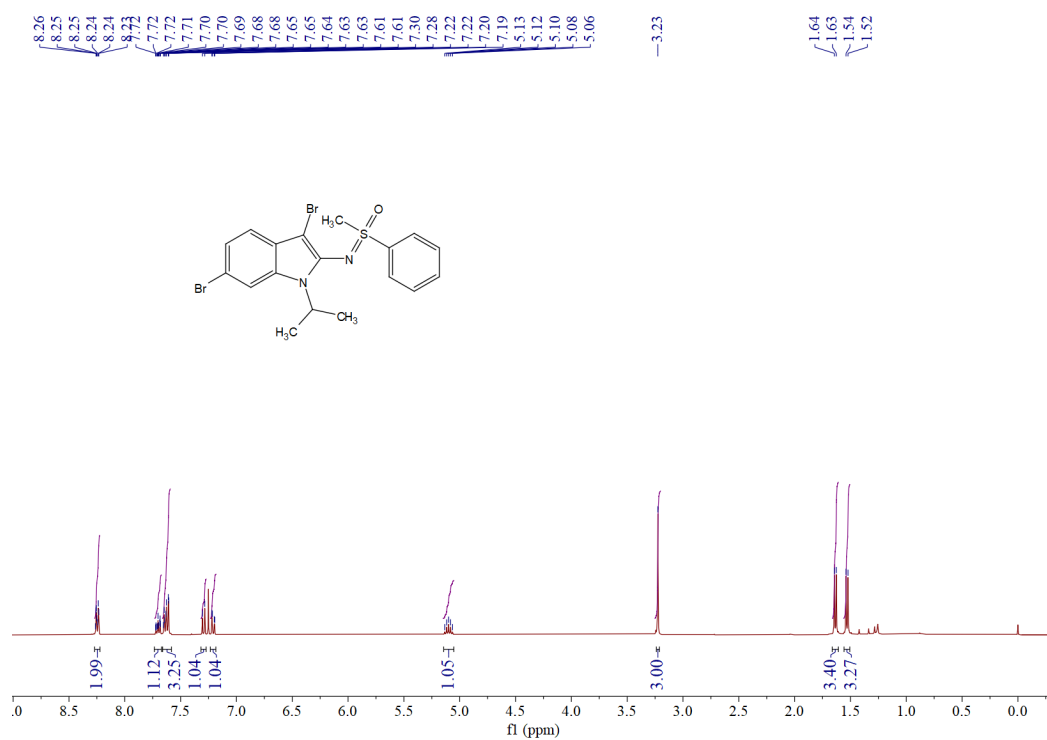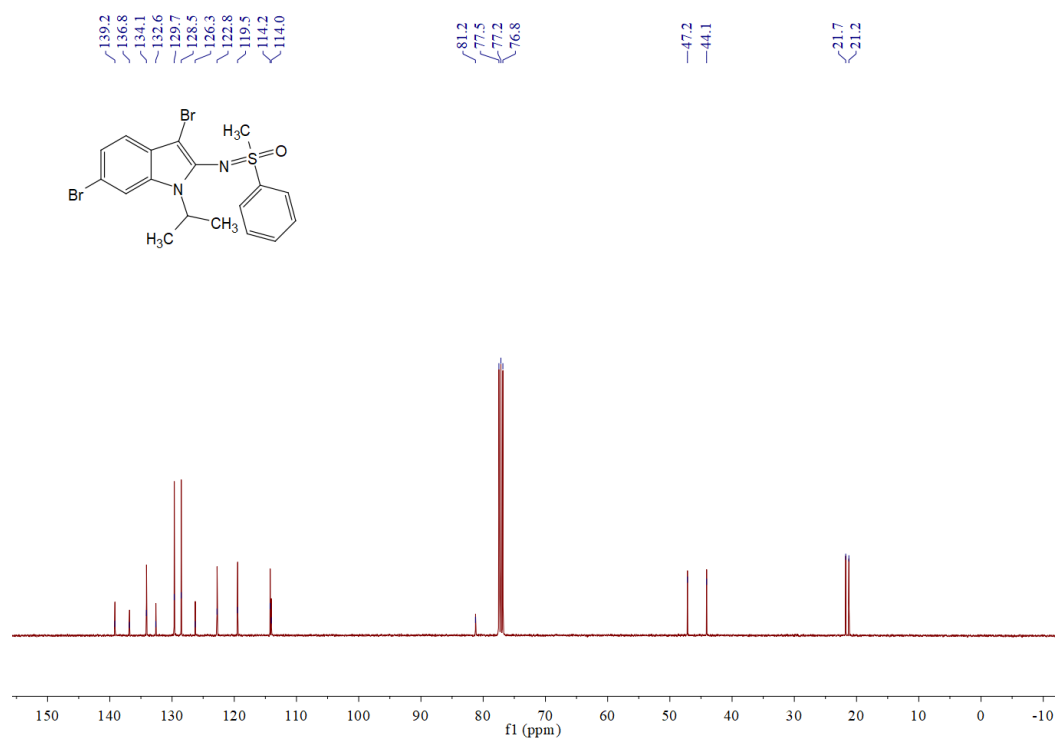



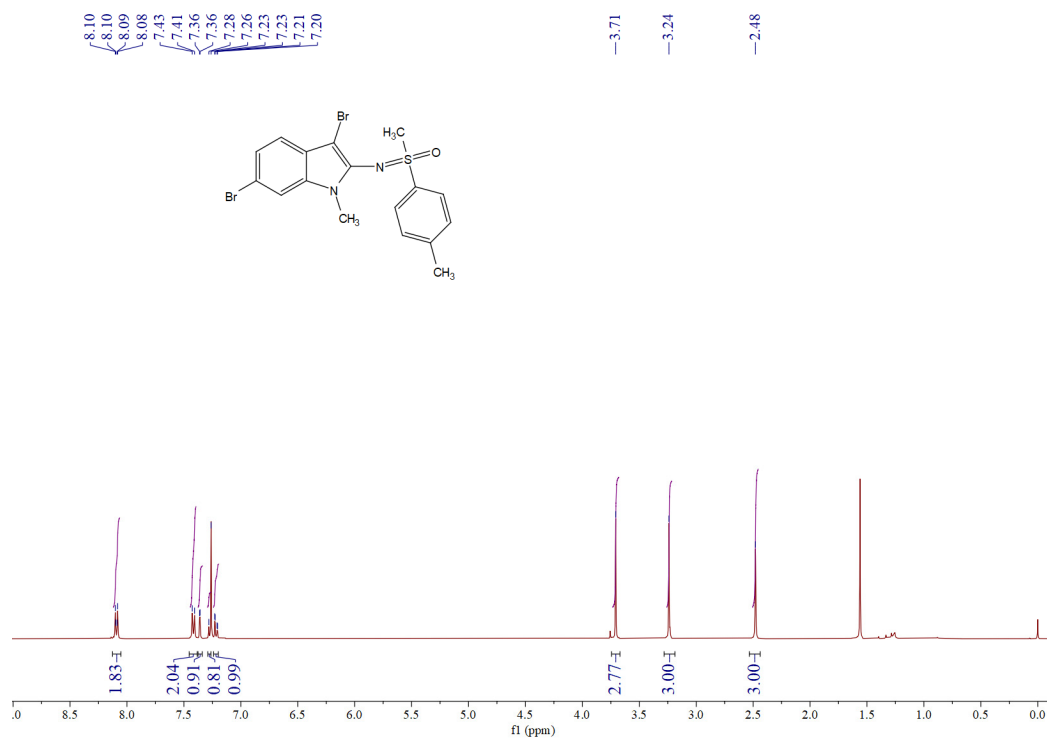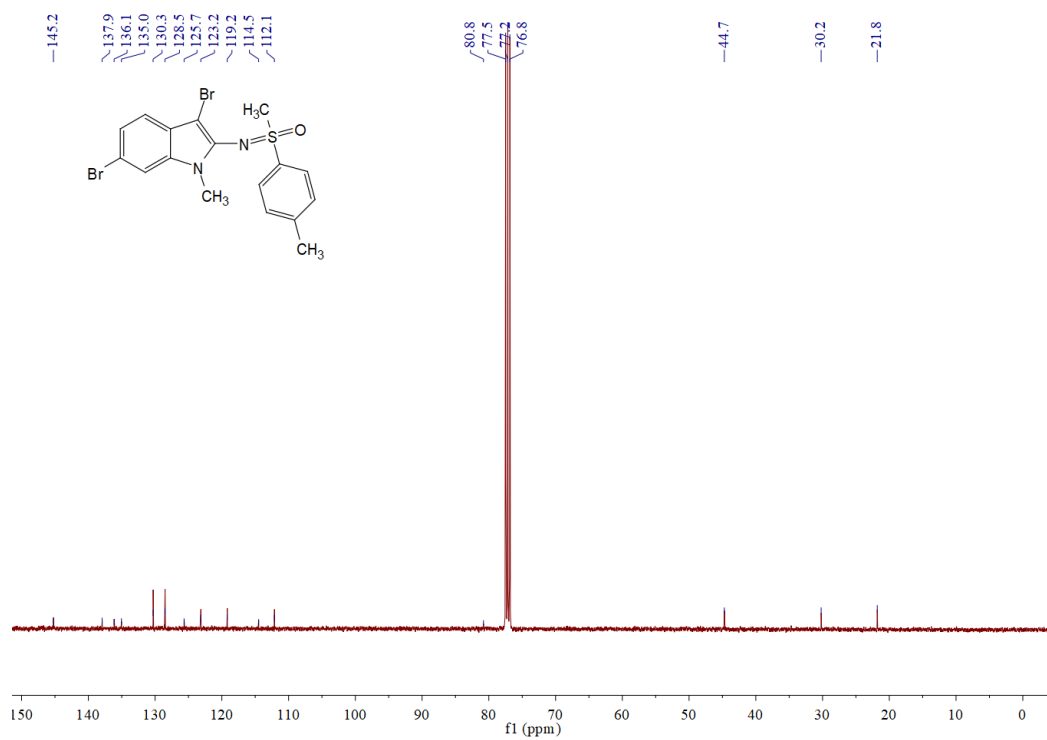

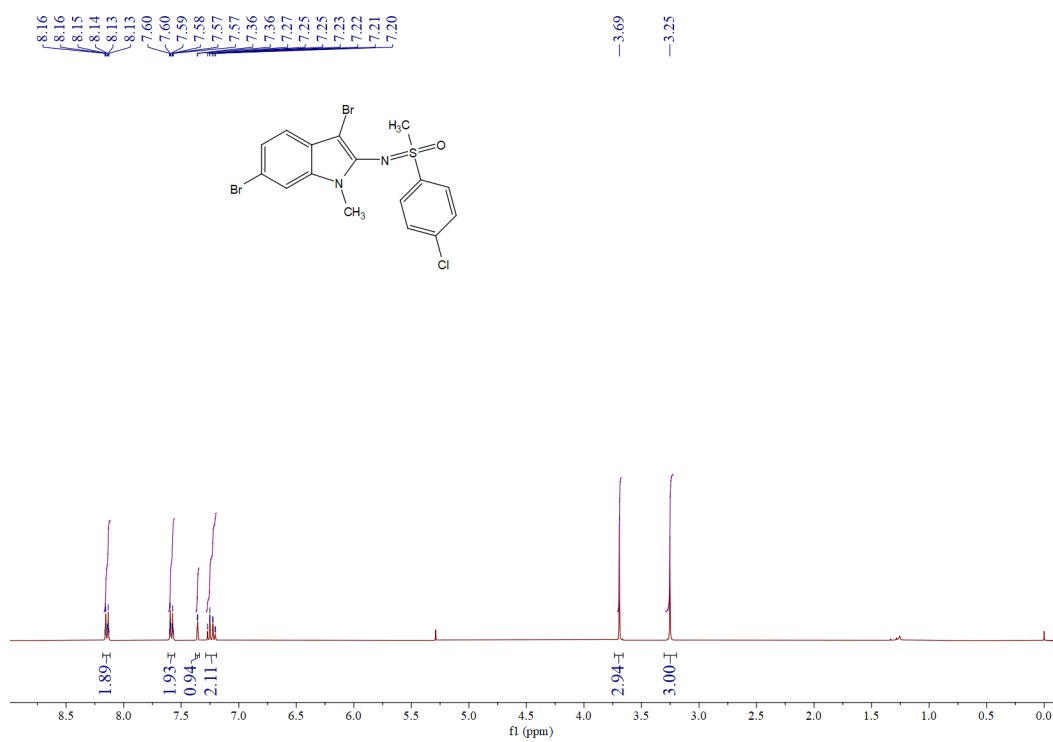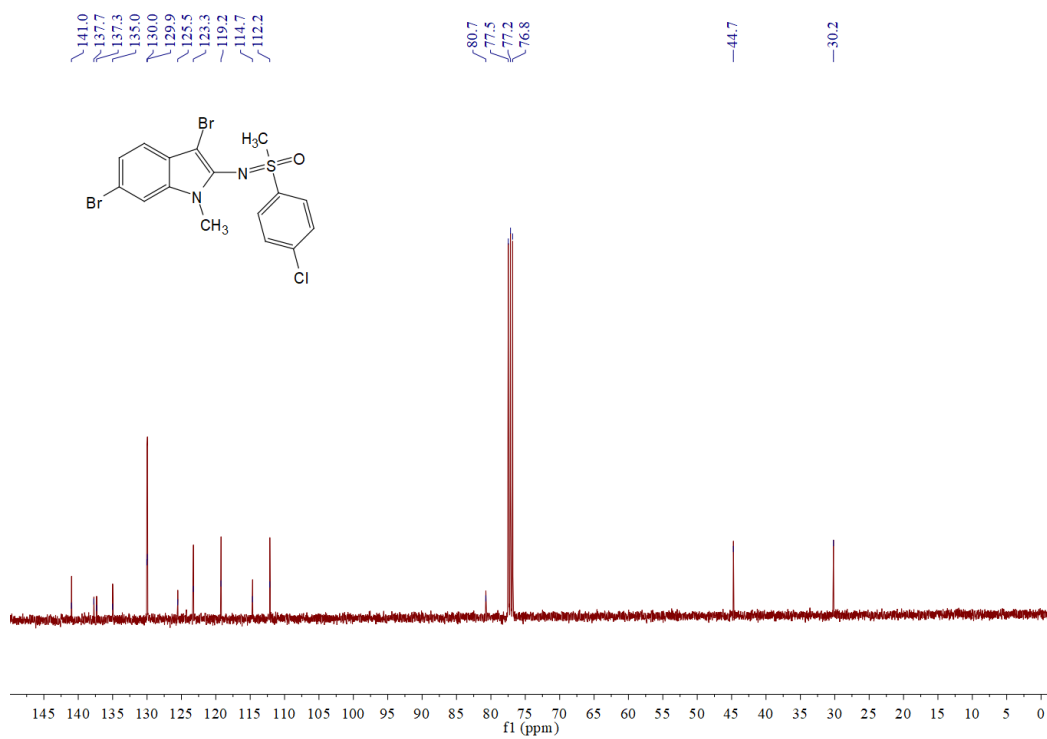

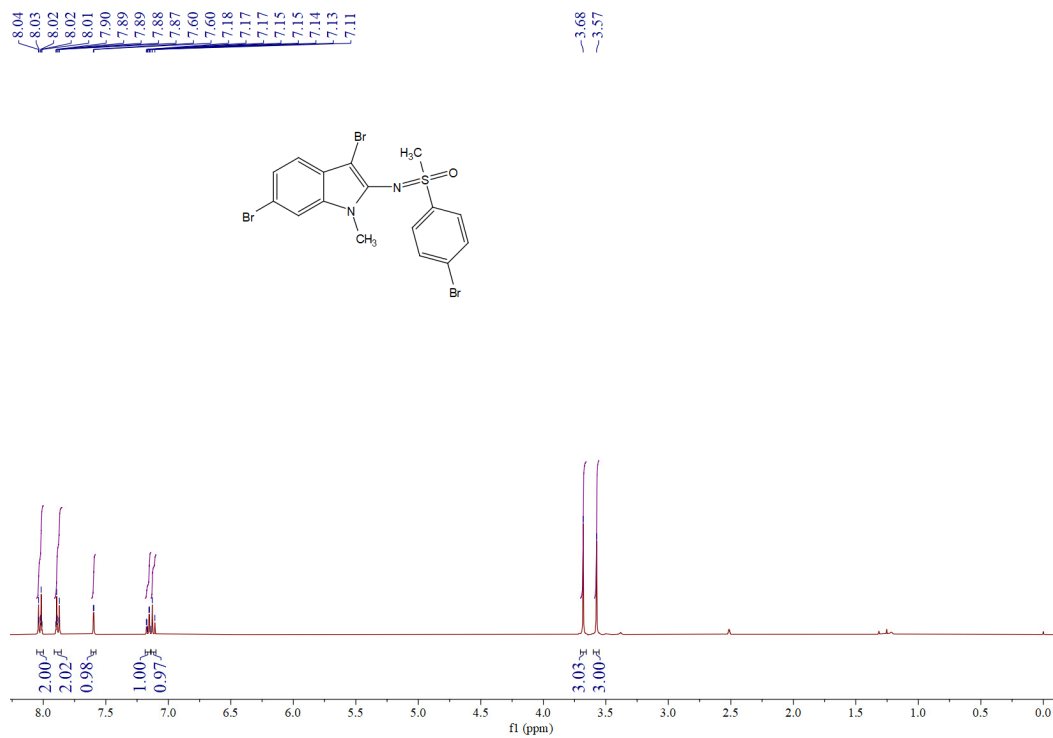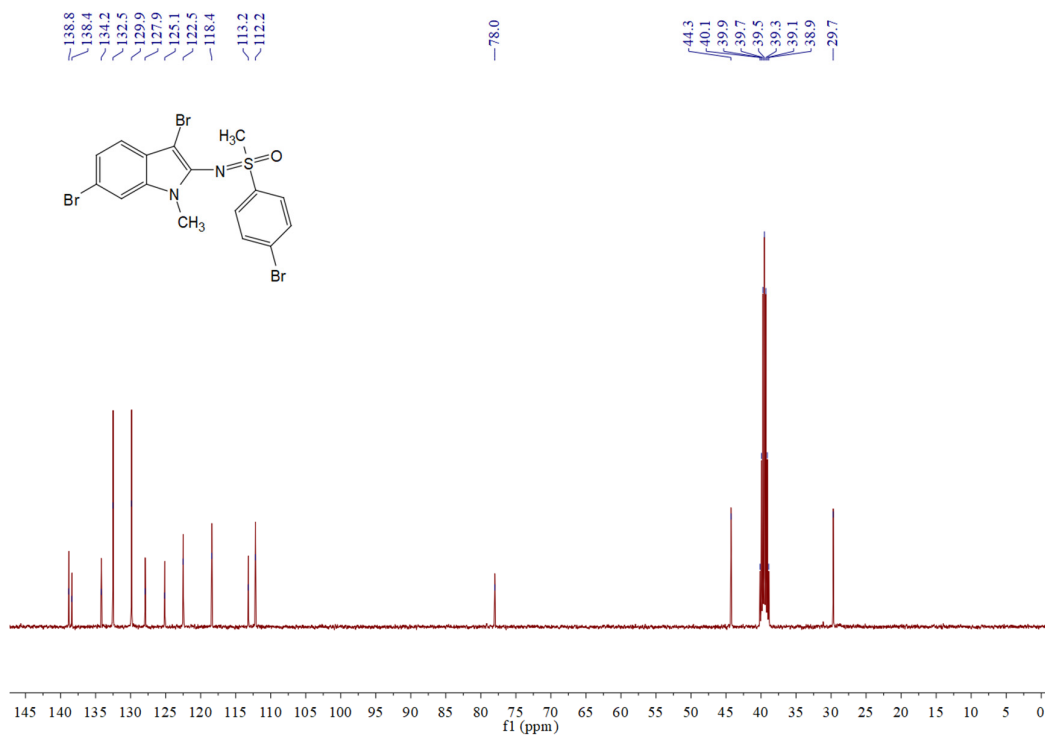

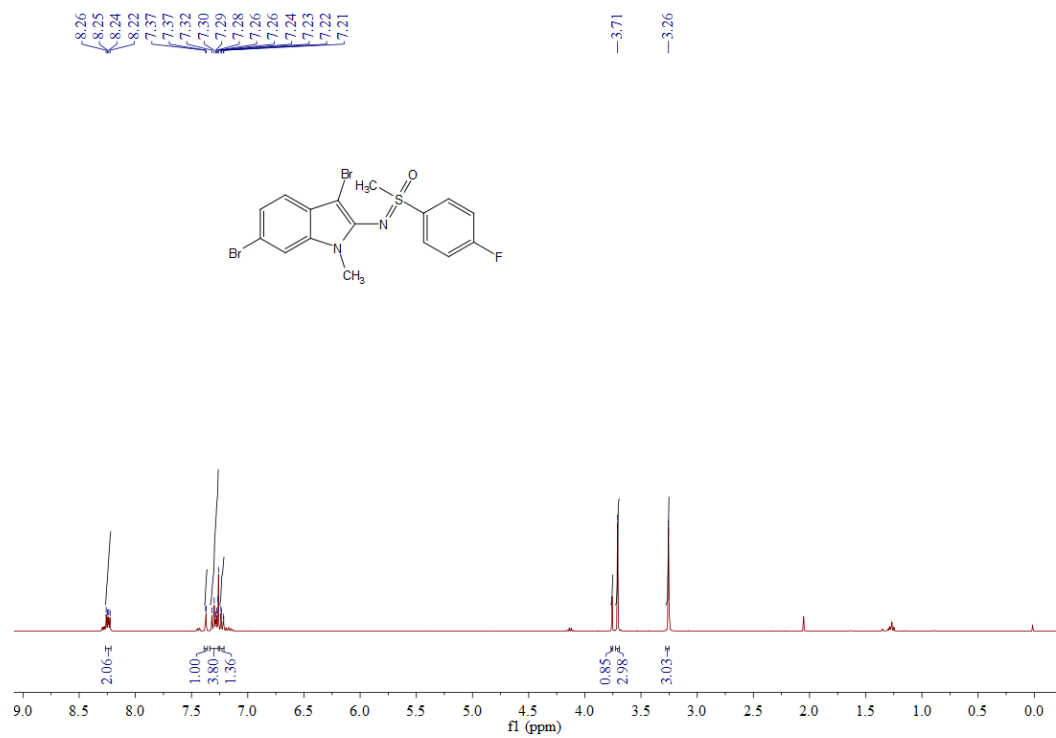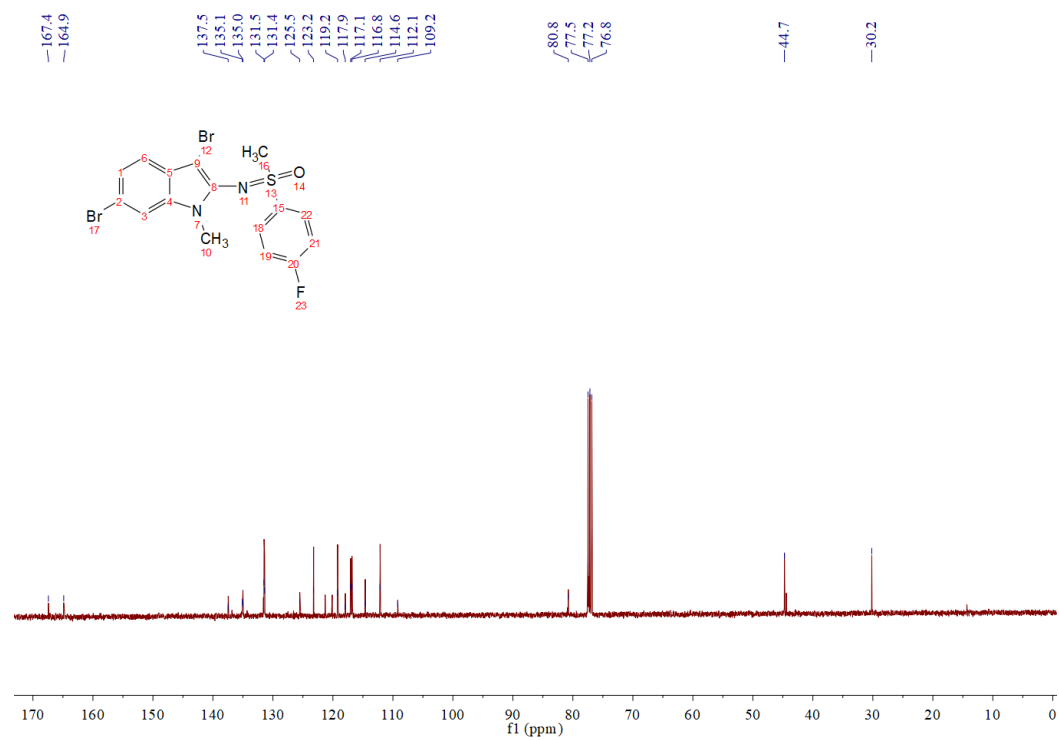

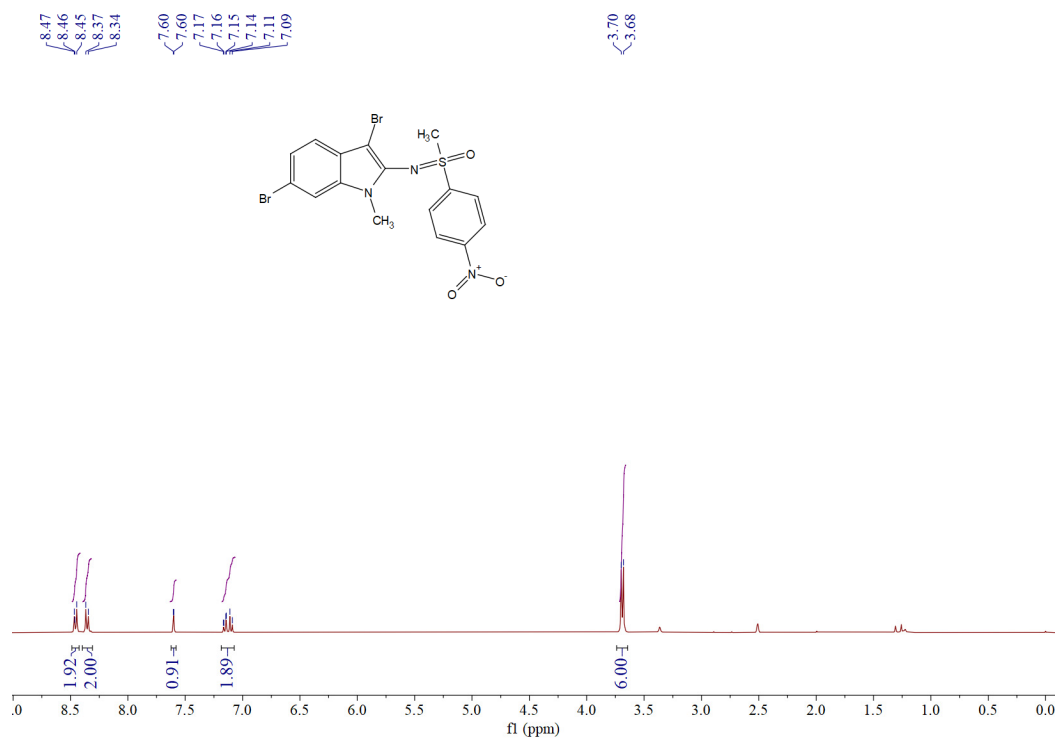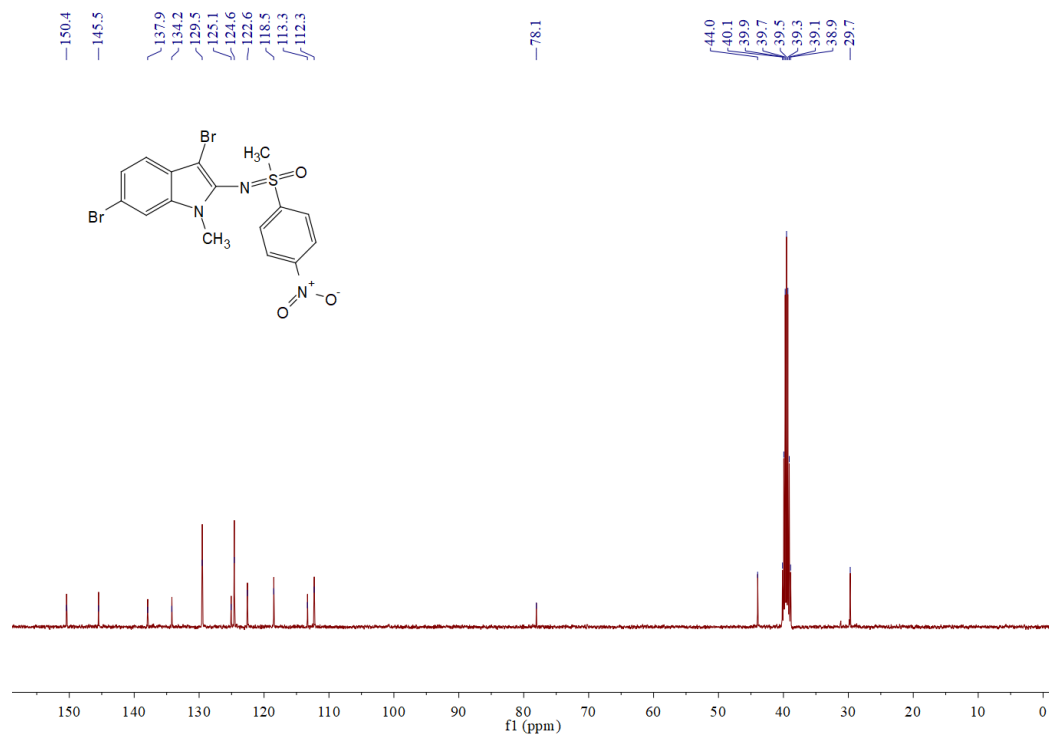

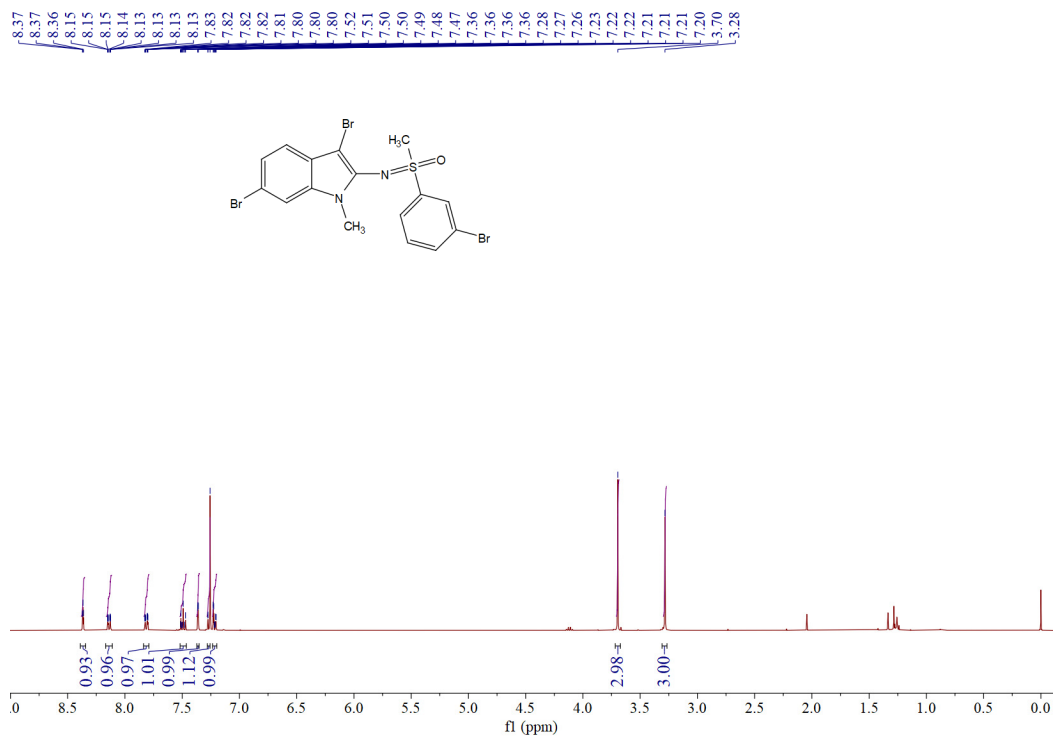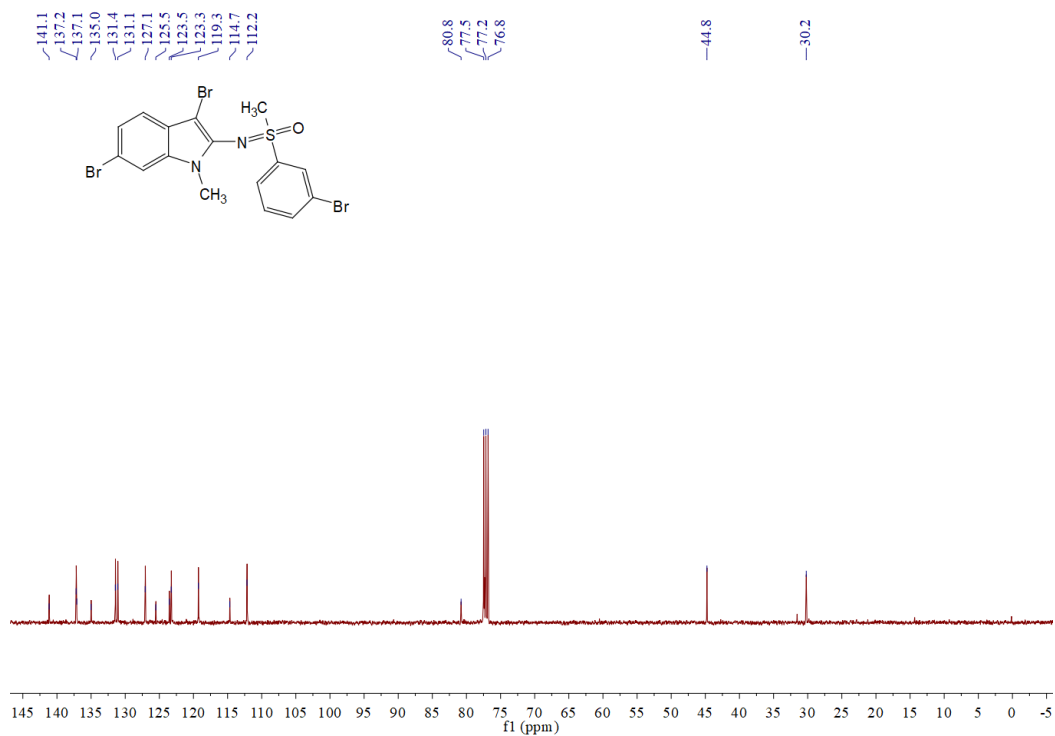

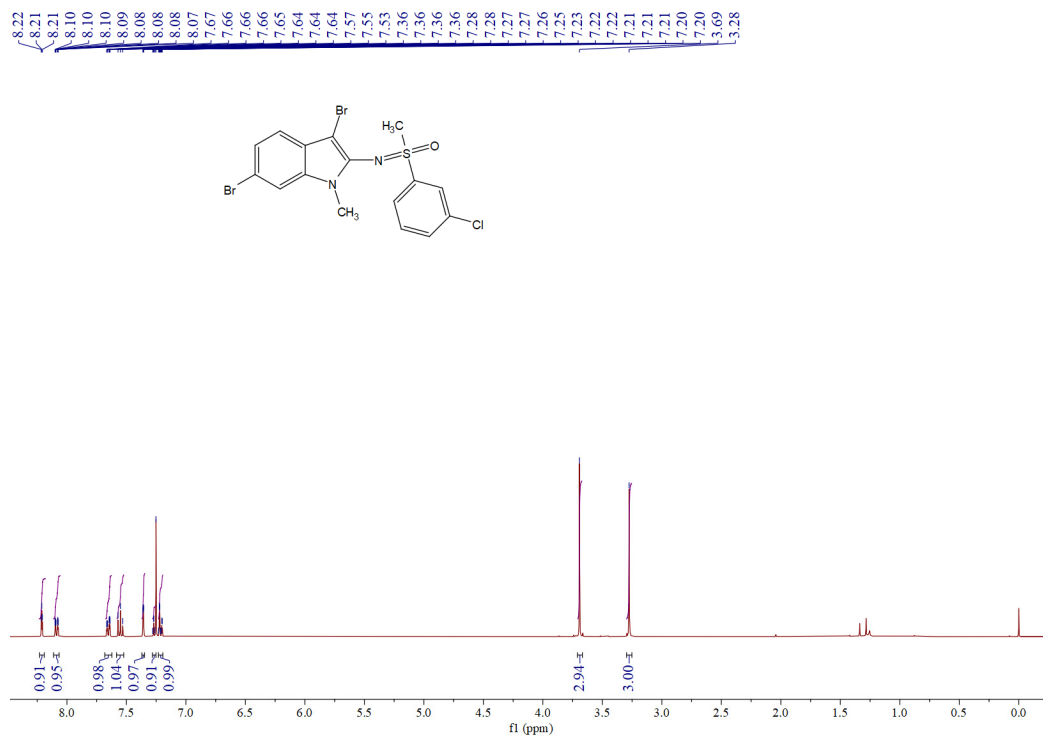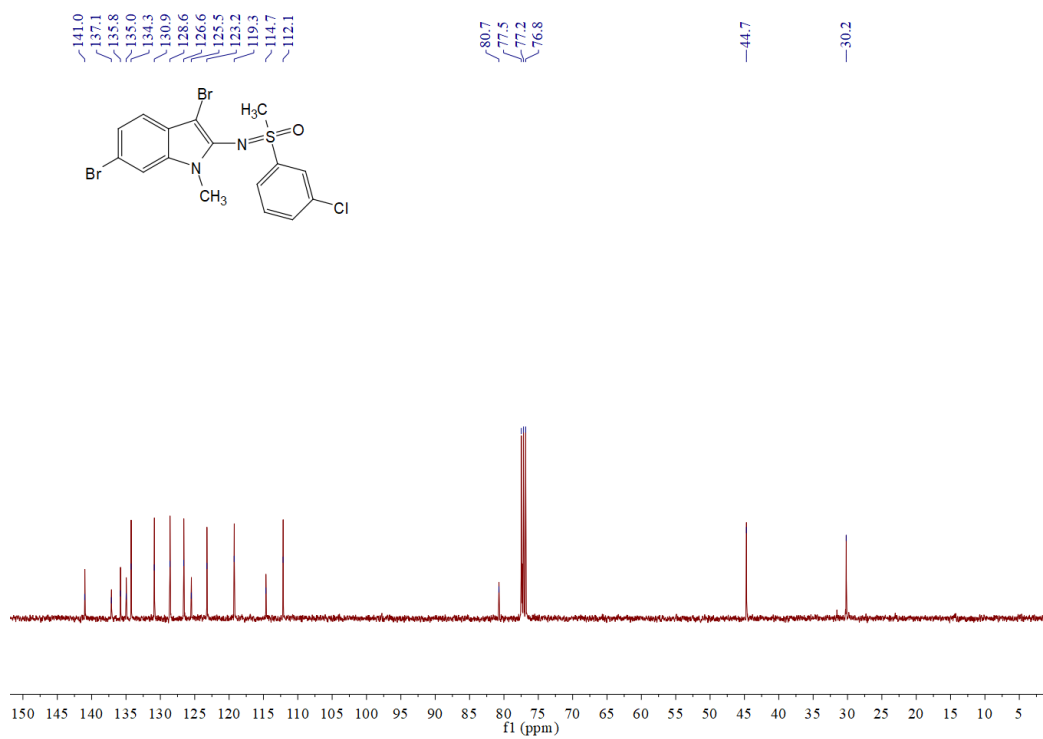

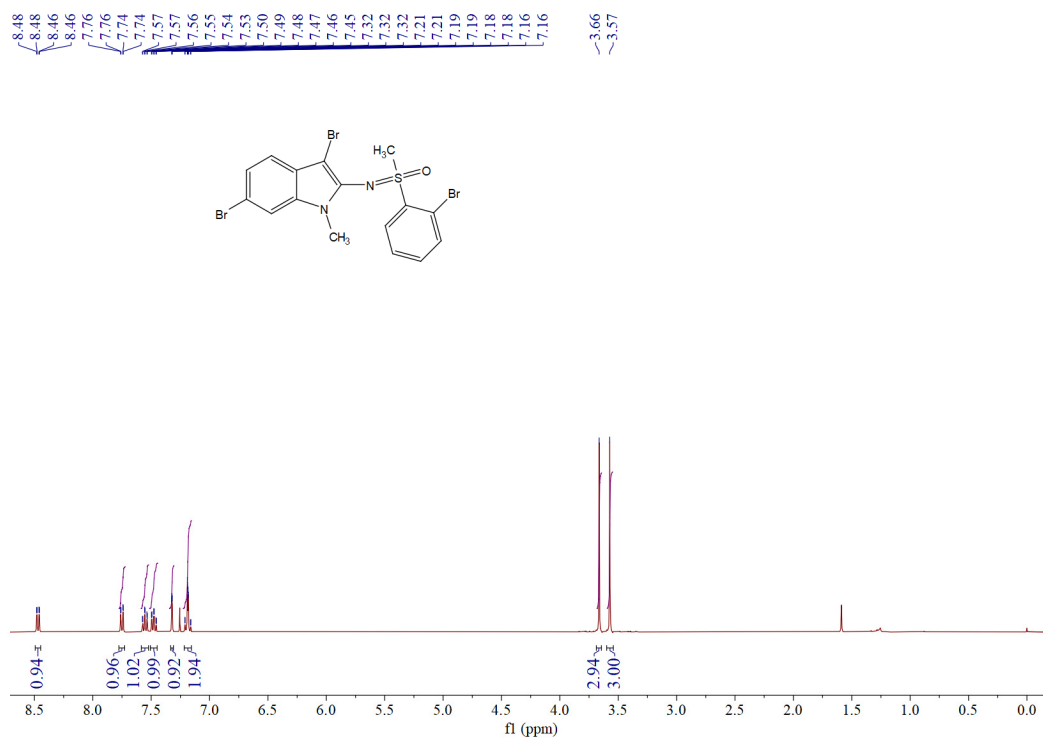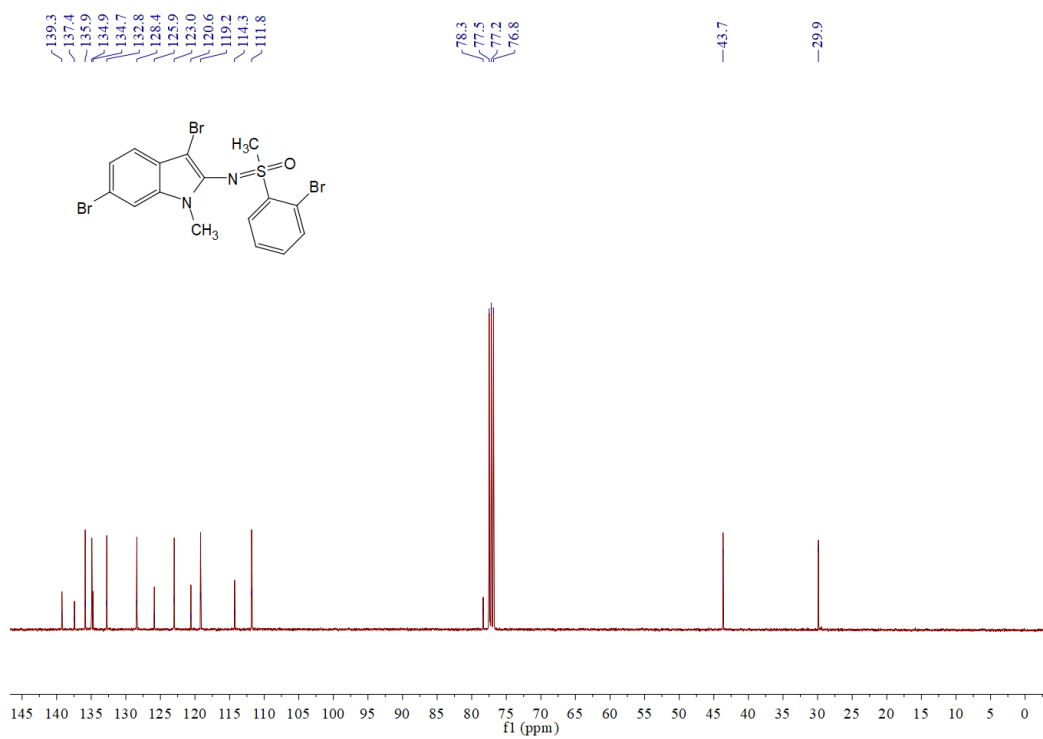



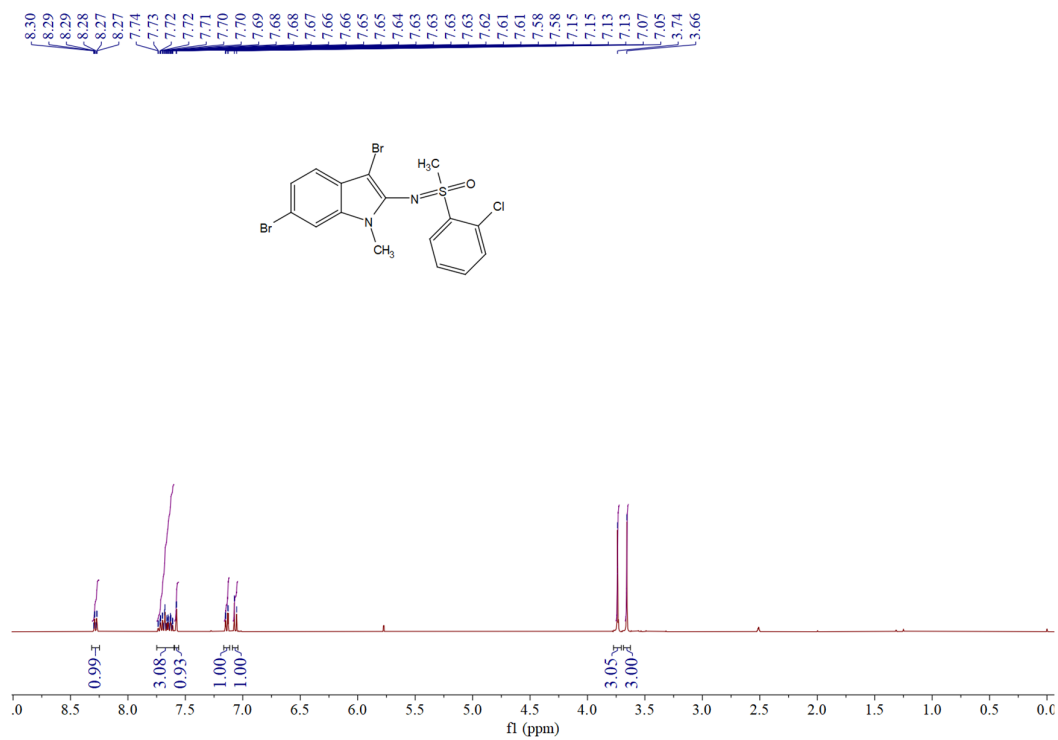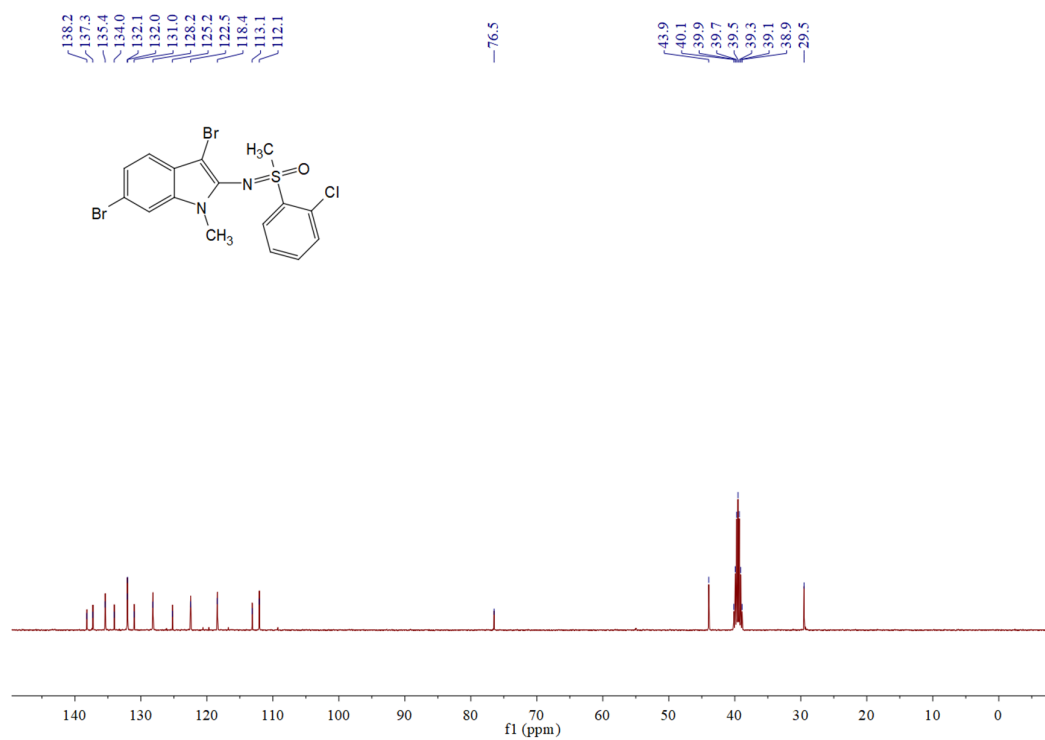

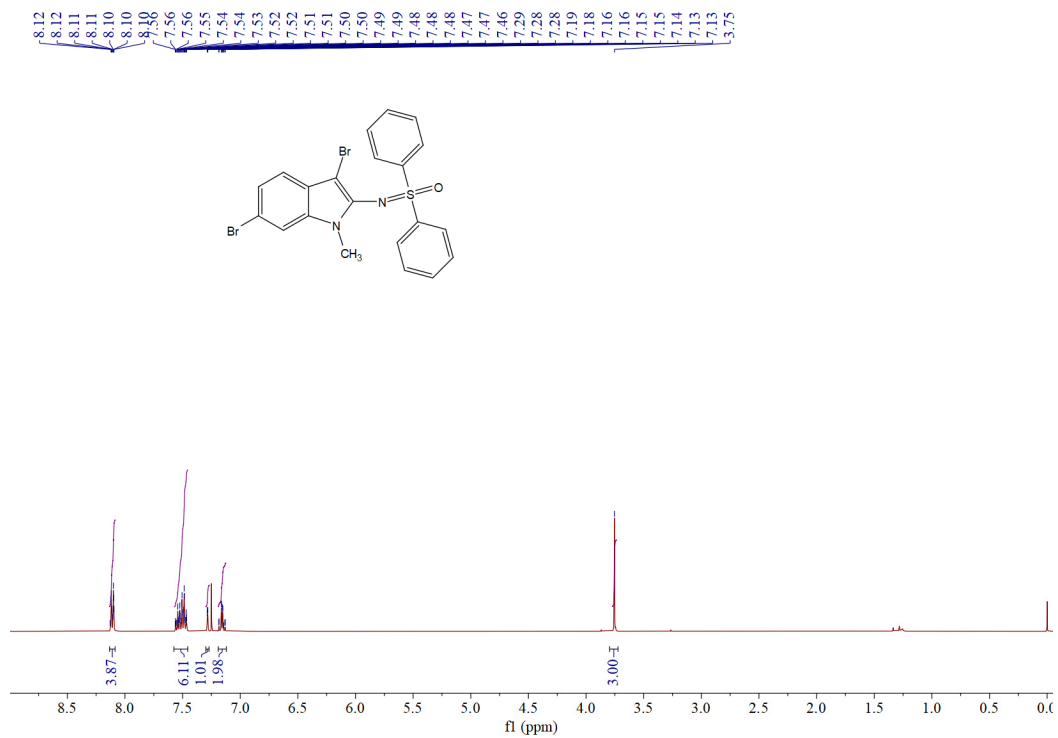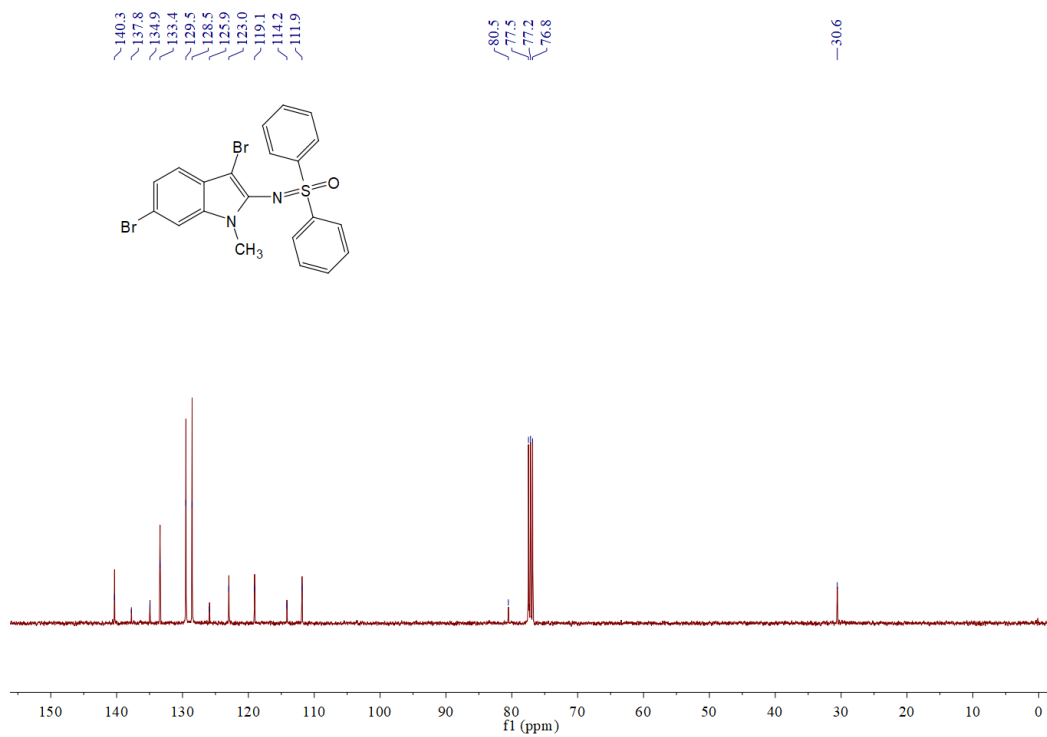

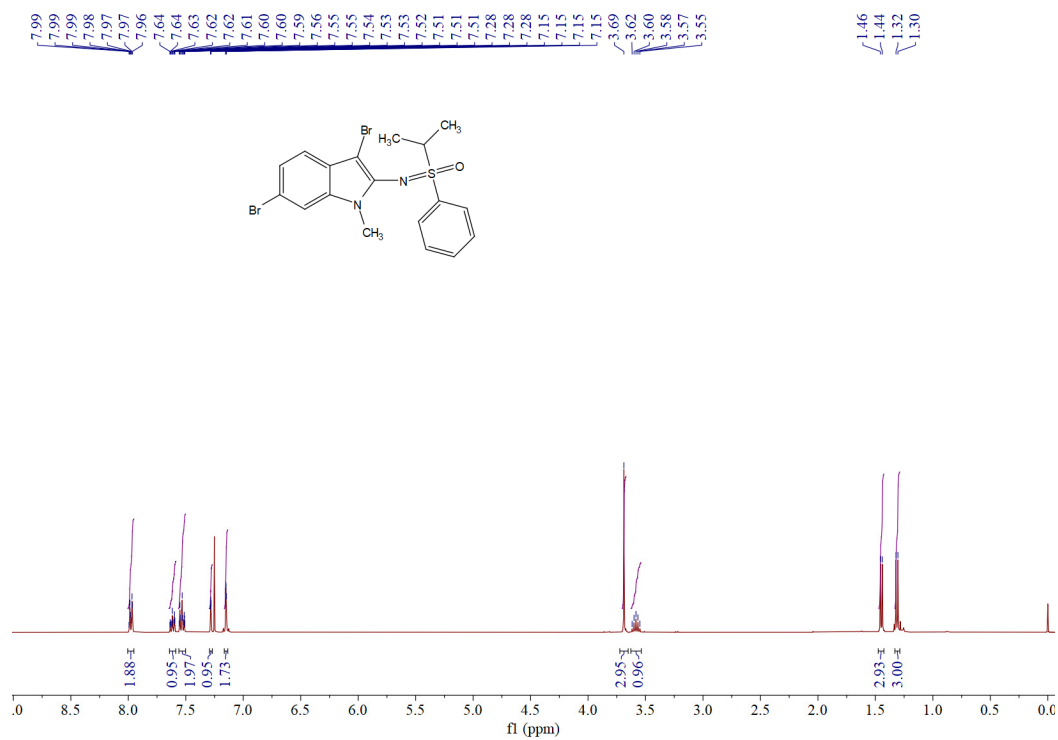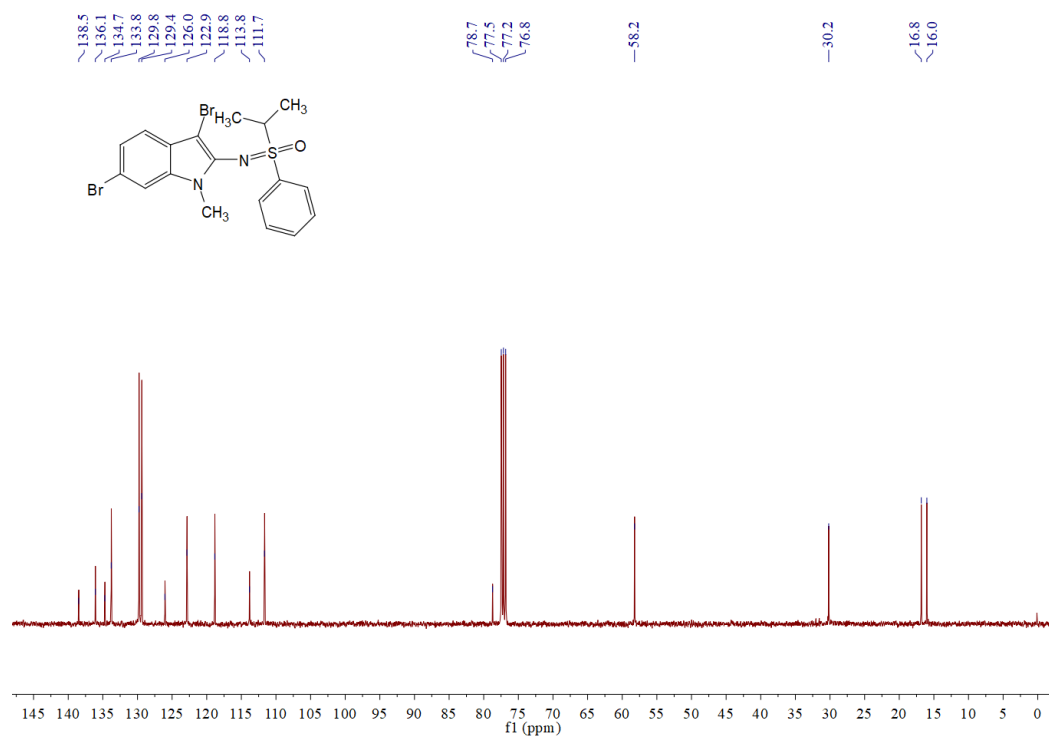

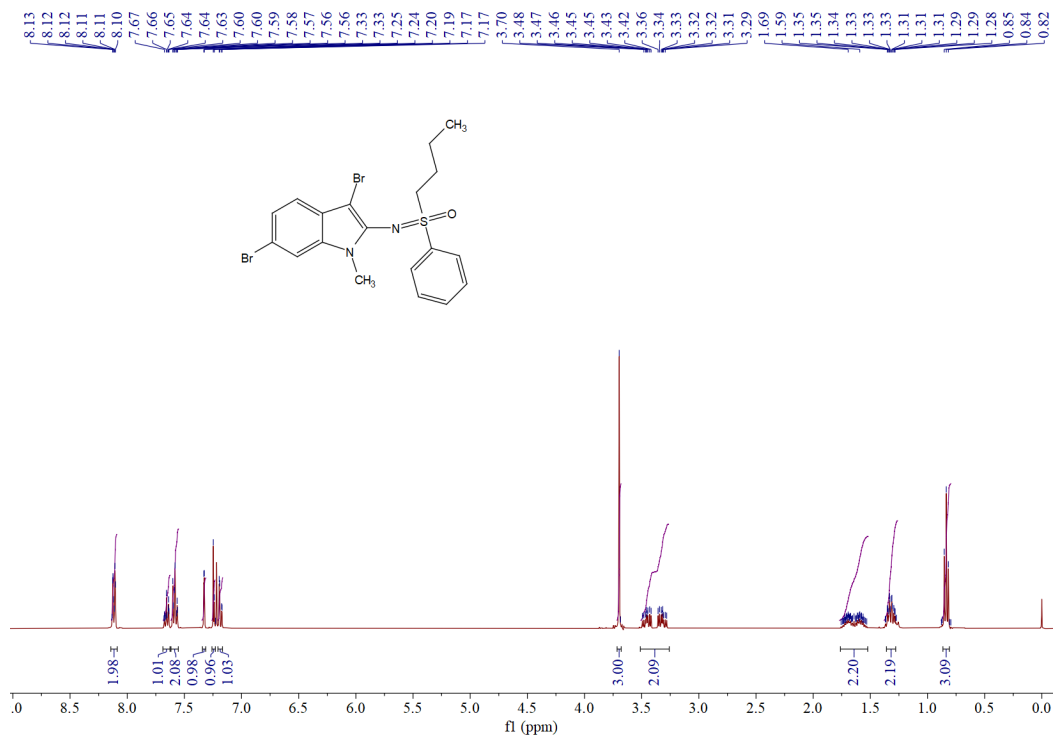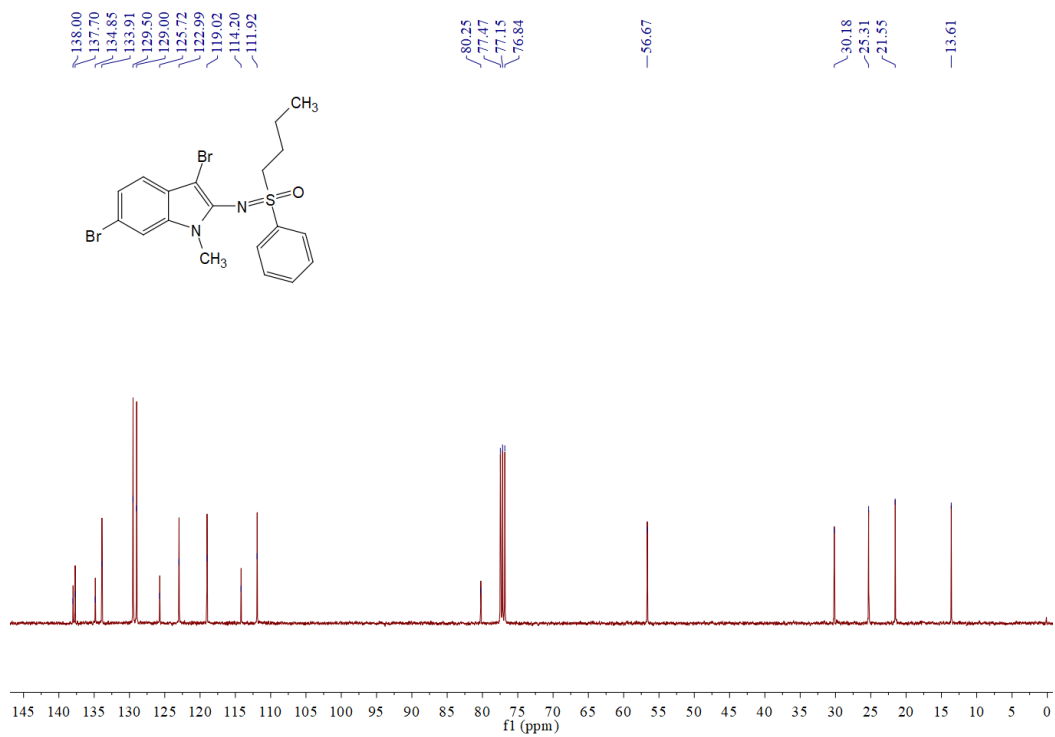

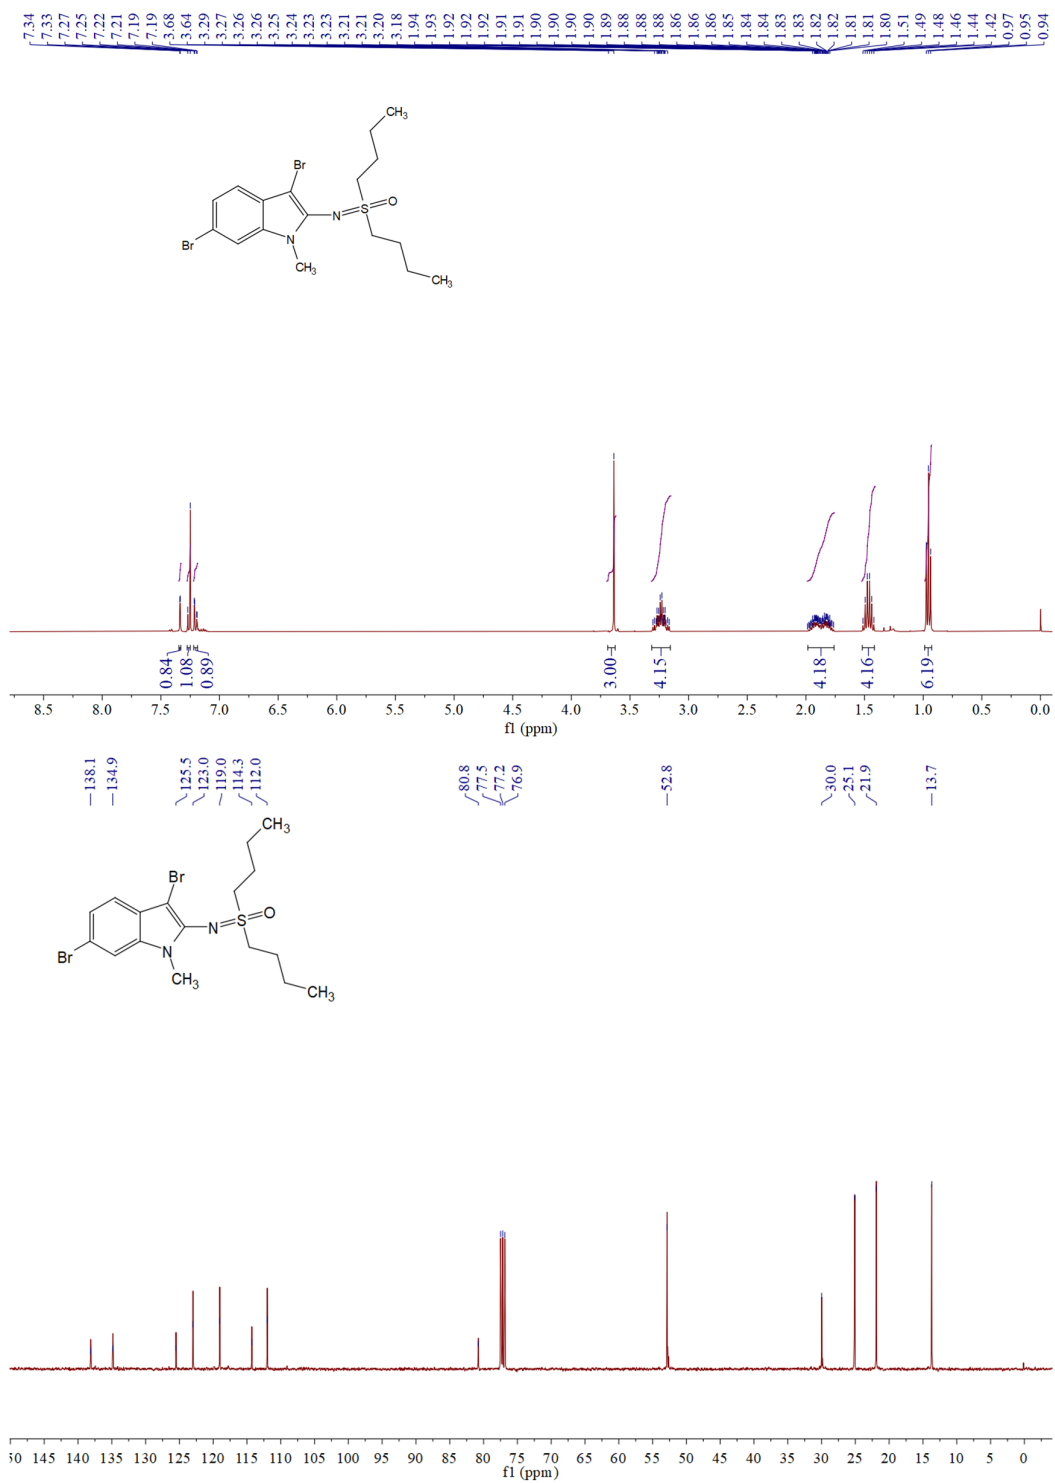

Supplement: s1 [file s1]
